# INHERITED INFERTILITY - MAPPING LOCI ASSOCIATED WITH IMPAIRED FEMALE REPRODUCTION

*Sanni Ruotsalainen<sup>1</sup>, Juha Karjalainen<sup>1,2,3,4,5</sup>, Mitja Kurki<sup>1,2,3,4,5</sup>, Elisa Lahtela<sup>1</sup>, Matti Pirinen<sup>1,6,7</sup>, Juha Riikonen<sup>1</sup>, Jarmo Ritari<sup>8</sup>, Silja Tammi<sup>8</sup>, Jukka Partanen<sup>8</sup>, Hannele Laivuori<sup>1,9,10,11</sup>, FinnGen\*, Aarno Palotie<sup>1,2,3,4,5,12</sup>, Henrike Heyne<sup>1,2,13,14,15</sup>, Mark Daly<sup>1,2,3,4,5</sup>, Elisabeth Widen<sup>1\*\*</sup>*

- 1) *Institute for Molecular Medicine Finland (FIMM), HiLIFE, University of Helsinki, Helsinki, Finland*
  - 2) *Program for Medical and Population Genetics, Broad Institute of MIT and Harvard, Cambridge, MA, USA*
  - 3) *Stanley Center for Psychiatric Research, Broad Institute of MIT and Harvard, Cambridge, MA, USA.*
  - 4) *Analytic and Translational Genetics Unit, Massachusetts General Hospital, Boston, MA, USA.*
  - 5) *Center for Genomic Medicine, Massachusetts General Hospital, Boston, MA, USA.*
  - 6) *Department of Mathematics and Statistics, University of Helsinki, Helsinki, Finland*
  - 7) *Department of Public Health, University of Helsinki, Helsinki, Finland*
  - 8) *Finnish Red Cross Blood Service, R&D, Helsinki, Finland*
  - 9) *Medical and Clinical Genetics, University of Helsinki and Helsinki University Hospital, Helsinki, Finland*
  - 10) *Department of Obstetrics and Gynecology, Tampere University Hospital, Tampere, Finland*
  - 11) *Faculty of Medicine and Health Technology, Center for Child, Adolescent and Maternal Health Research, University of Tampere, Tampere, Finland*
  - 12) *Psychiatric and Neurodevelopmental Genetics Unit, Department of Psychiatry, Massachusetts General Hospital, Boston, MA, USA*
  - 13) *Digital Health Center, Hasso Plattner Institute for Digital Engineering, University of Potsdam, Potsdam, Germany*
  - 14) *Hasso Plattner Institute for Digital Health at Mount Sinai, Icahn School of Medicine at Mount Sinai, New York, NY, USA*
  - 15) *Department of Genetics and Genomic Sciences, Icahn School of Medicine at Mount Sinai, New York, NY, USA*
- \* A full list of the FinnGen research team members appears at the end of the paper.*

**\*\*Corresponding author**

E-mail: [elisabeth.widen@helsinki.fi](mailto:elisabeth.widen@helsinki.fi)

## ABSTRACT

Female infertility is a common and complex health problem affecting millions of women worldwide. While multiple factors can contribute to this condition, the underlying cause remains elusive in up to 15-30% of cases. In our large genome-wide association study (GWAS) of 22,849 women with infertility and 198,989 controls from the Finnish population cohort FinnGen, we unveil a unique landscape of genetic factors associated with the disease. Our recessive analysis identified a low-frequency stop-gained mutation in *TBPL2* (p.Arg331Ter; minor allele frequency (MAF) = 1.2%) with an impact comparable to highly penetrant monogenic mutations (OR = 650,  $p = 4.1 \times 10^{-25}$ ). While previous studies have linked the homologous gene to anovulation and sterility in knockout mice, the severe consequence of the p.Arg331Ter mutation was evidenced by homozygous carriers having significantly fewer offspring (average of 0.16) compared to women belonging to the other genotype groups (average of 1.75 offspring,  $p = 1.4 \times 10^{-15}$ ). Notably, all homozygous women who had given birth had received infertility therapy. Moreover, our age-stratified analyses identified three additional genome-wide significant loci. Two loci were associated with early-onset disease (infertility diagnosed before age 30), located near *CHEK2* and within the major histocompatibility complex (MHC) -region. The third locus, associated with late-onset disease, had its lead SNP located in an intron of a lncRNA gene. Taken together, our data highlight the significance of rare recessive alleles in shaping female infertility risk. The results further provide evidence supporting specific age-dependent mechanisms underlying this complex disorder.

## 1 INTRODUCTION

2 Infertility affects millions of individuals of reproductive age worldwide. WHO  
3 estimates that the lifetime prevalence of infertility in the Americas and Europe is 20%  
4 and 16.5%, respectively.<sup>1</sup> Although infertility may stem from factors related both to  
5 women and men, it is commonly attributed to female factors, either entirely or in  
6 part.<sup>2</sup> Ovarian dysfunction is a prevalent underlying reason, and age-related infertility  
7 is also on the rise due to delayed childbirth. Yet in 15-30% of cases, the cause of  
8 infertility remains unexplained despite thorough clinical investigation.<sup>2,3</sup>

9

10 Certain pre-existing conditions, such as polycystic ovarian syndrome (PCOS),  
11 endometriosis, and uterine fibroids, are associated with increased infertility risk in  
12 women. Genome-wide association studies (GWAS) have identified 20, 40, and 30  
13 common variant loci linked to these conditions, respectively, implicating hormone  
14 signaling and cell growth pathways.<sup>4-6</sup> A more recent GWAS meta-analysis of  
15 40,024 women affected by infertility from 6 different cohorts further identified  
16 significant genetic correlations between all-cause female infertility and endometriosis  
17 and fibroids, and a correlation between anovulatory infertility and polycystic ovary  
18 syndrome (PCOS)<sup>7</sup>. In that study, the majority of the 19 reported infertility loci were  
19 also associated with endometriosis, PCOS, or fibroids.<sup>7</sup>

20

21 While the previous GWAS analyses of infertility and its related disorders in women  
22 have targeted common genetic variation, it can be expected that rare or low-  
23 frequency recessive variants may be particularly significant causes of impaired  
24 reproduction. In fact, our previous exploration of over 40,000 coding variants across  
25 >2,000 disease phenotypes in the Finnish population cohort FinnGen, revealed a

26 recessive association of female infertility with low-frequency variant near  
27 *PKHD1/EBAG9*.<sup>8</sup> That study comprised 7,980 women affected by infertility. We now  
28 present results from an expanded recessive association analysis encompassing  
29 22,849 women affected by infertility and 198,989 controls from the FinnGen cohort.  
30 Genetic drift and historical bottlenecks have shaped the Finnish population structure  
31 leading to an enrichment of genetic variants in the 0.5-5% allele frequency range in  
32 the current population.<sup>9</sup> Thus, we expect the FinnGen cohort to be highly potent and  
33 well-suited for the successful identification of such mutations impacting reproduction.

## 34 SUBJECTS AND METHODS

### 35 Study cohort and data

36 We studied female infertility in the large Finnish research project FinnGen<sup>9</sup>  
37 (<https://www.finngen.fi/en>) launched in 2017. FinnGen is a public-private research  
38 project, combining genome and digital healthcare data on over 500,000 Finns. The  
39 nationwide research project aims to provide novel medically and therapeutically  
40 relevant insight into human diseases. FinnGen is a pre-competitive partnership of  
41 Finnish biobanks and their background organizations (universities and university  
42 hospitals) and international pharmaceutical industry partners and Finnish biobank  
43 cooperative (FINBB). All FinnGen partners are listed here:  
44 <https://www.finngen.fi/en/partners>. This study is based on FinnGen data release 12  
45 including 520,210 participants of which 293,373 (56,39 %) are females.

46

### 47 Definition of female infertility

48 The clinical disease endpoint ‘female infertility’ was constructed based on the  
49 register codes using the Finnish version of the International Classification of  
50 Diseases, 10th revision (ICD-10) diagnosis codes and harmonizing them with  
51 definitions from ICD-8 and ICD-9 as follow: at least one record of female infertility  
52 diagnosis (N97\* or N98\* [ICD-10], or 628\* [ICD8 and 9]), or at least one record of  
53 purchased medication used for infertility treatments (ATC codes G03GA\* or  
54 G03GB\*) or a record of a procedure used for treatment of infertility (e.g.  
55 insemination), (NOMESCO codes: TLW00, TLW10, TLW11, TLW12, TLW14 or  
56 TLW20). Women with an infertility record including only ICD10 code N97.4 (“Female  
57 infertility associated with male factors”) were excluded from the analyses. As

58 controls, we used women who have given birth based on data from the Medical Birth  
59 Register and the Finnish Population Register. Using these criteria, we  
60 identified 22,849 women affected by infertility and 198,989 controls.

61

62 **Table 1:** Basic characteristics of the study cohort.

|                                                   | <b>All</b>      | <b>Cases</b>   | <b>Controls</b> |
|---------------------------------------------------|-----------------|----------------|-----------------|
| <b>N (%)</b>                                      | 221,838 [100]   | 22,849 [10.29] | 198,989 [89.70] |
| <b>Age (mean [SD])<sup>a</sup></b>                | 61.40 [16.33]   | 51.09 [12.91]  | 62.59 [16.26]   |
| <b>BMI (mean [SD])<sup>b</sup></b>                | 27.50 [5.72]    | 27.21 [5.96]   | 27.53 [5.69]    |
| <b>Given birth (N [%])</b>                        | 216,469 [97.57] | 17,480 [76.50] | 198,989 [100]   |
| <b>Age at first birth (mean [SD])<sup>c</sup></b> | 26.20 [5.11]    | 30.22 [5.77]   | 25.84 [4.89]    |
| <b>N offspring (mean [SD])</b>                    | 2.22 [1.22]     | 1.50 [1.19]    | 2.30 [1.19]     |
| <b>Endometriosis (N [%])</b>                      | 16,618 [7.49]   | 4,607 [20.16]  | 12,011 [6.03]   |
| <b>PCOS (N [%])</b>                               | 1,691 [0.76]    | 1,011 [4.42]   | 590 [0.29]      |
| <b>Leiomyoma of uterus (N [%])</b>                | 35 199 [15.86]  | 3 346 [14.64]  | 31 853 [16.01]  |

63

64 <sup>a</sup> Age at end of follow-up or death

65 <sup>b</sup> BMI information available only for 150,636 [67.90 %] women (15,453 [67.63 %] cases and 135 183  
66 [67.93 %] controls

67 <sup>c</sup> Information available only for women who have given birth at least once (n = 216,469, 17,489 cases  
68 and 198,989 controls).

69

70 The basic clinical characteristics of cases and controls are presented in **Table 1**.

71 Given that the Drug Reimbursement Register contains data starting from 1995,

72 women who have received in vitro fertilization (IVF) therapy prior to this date cannot

73 be identified as cases unless they have received a record of infertility in the Hospital

74 Discharge Register (HILMO). In addition, given that our resolution to distinguish

75 between cases and controls is much higher for women suffering from reduced fertility  
76 starting from the mid-1990's, the FinnGen women identified as cases are younger  
77 than the controls (difference of the mean = 11.99 years,  $p < 1 \times 10^{-324}$ ;  
78 **Supplementary Figure 1**). In the analyses, this age difference has been considered  
79 by using birth year as a covariate in the GWAS analyses, and when calculating the  
80 disease prevalence. In the analyses of disease enrichment, both cases and controls  
81 have been matched by birth year.

82

83 5,701 (24.95 %) of cases were secondary infertility cases, i.e., they received the  
84 infertility diagnosis after having at least one child. On average, the cases with  
85 infertility who have at least one child were on average 4.37 years older than controls  
86 when giving birth for the first time ( $p < 1 \times 10^{-324}$ ; **Supplementary Figure 2**)

87

## 88 Genotyping and imputation

89 FinnGen samples were genotyped with multiple Illumina and Affymetrix arrays  
90 (Thermo Fisher Scientific, Santa Clara, CA, USA). Genotype calls were made with  
91 GenCall and zCall algorithms for Illumina and AxiomGT1 algorithm for Affymetrix  
92 chip genotyping data batch-wise. Genotyping data produced with previous chip  
93 platforms were lifted over to build version 38 (GRCh38/hg38) following the protocol  
94 described here: [dx.doi.org/10.17504/protocols.io.nqtddwn](https://doi.org/10.17504/protocols.io.nqtddwn). Samples with sex  
95 discrepancies, high genotype missingness ( $> \square 2\%$ ), excess heterozygosity in  
96 common variants (allele frequency  $> 0.05$ ) ( $\pm 3SD$ ) per batch, and non-Finnish  
97 ancestry were removed. Variants with high missingness ( $> \square 2\%$ ), deviation from  
98 Hardy–Weinberg equilibrium ( $P \square < \square 1 \times 10^{-6}$ ) and low minor allele count ( $MAC \square < \square 3$ )  
99 were removed.

100

101 Pre-phasing of genotyped data was performed with Eagle 2.3.5  
102 (<https://data.broadinstitute.org/alkesgroup/Eagle/>) with the default parameters,  
103 except the number of conditioning haplotypes was set to 20,000. Imputation of the  
104 genotypes was carried out by using the population-specific Sequencing Initiative  
105 Suomi (SISu) v4.2 imputation reference panel with Beagle 4.1 (version 08Jun17.d8b,  
106 [https://faculty.washington.edu/browning/beagle/b4\\_1.html](https://faculty.washington.edu/browning/beagle/b4_1.html)) as described in the  
107 following protocol: [dx.doi.org/10.17504/protocols.io.nmndc5e](https://doi.org/10.17504/protocols.io.nmndc5e). SISu v4.2 imputation  
108 reference panel was developed using the high-coverage (25–30x) whole-genome  
109 sequencing data generated at the Broad Institute of MIT and Harvard and at the  
110 McDonnell Genome Institute at Washington University, USA; and jointly processed  
111 at the Broad Institute. Variant callset was produced with Genomic Analysis Toolkit  
112 (GATK) HaplotypeCaller algorithm by following GATK best practices for variant  
113 calling. Genotype-, sample- and variant-wise quality control was applied in an  
114 iterative manner by using the Hail framework v0.2. The resulting high-quality WGS  
115 data for 3,775 individuals were phased with Eagle 2.3.5 as described above. As a  
116 post-imputation quality control, variants with INFO score < 0.7 were excluded.

117

## 118 Genome-wide association study

119 A total of 221,838 (22,849 cases and 198,989 controls) female samples from  
120 FinnGen Data Freeze 12 were analyzed using REGENIE<sup>10</sup>. All models were adjusted  
121 for age at the end of follow-up or death, birth year, genotyping batch, and first ten  
122 principal components (PC). Both additive and recessive models were performed,  
123 using imputed genotypes (n variants = 21,296,962). Recessive analyses were  
124 performed for variants with at least 2 homozygous carriers for the minor allele (n



125 variants = 15,421,131). All variants reaching genome-wide significance p-value  
126 threshold of  $5 \times 10^{-8}$  were considered genome-wide significant (GWS). All GWS  
127 regions were fine-mapped using SUSIE<sup>11</sup>, and independent genome-wide significant  
128 loci were determined as ‘good quality’ credible sets from those analyses.

129 To investigate the effect of advanced maternal age on reduced fertility, we also  
130 performed age-stratified GWAS. Based on the maternal age corresponding to the  
131 first record of female infertility, we divided our cases into ‘early-onset’ (‘infertility  
132 diagnosis before age of 30’, n = 9,185) and ‘late-onset’ (‘infertility diagnosis after age  
133 of 30’, n = 13,664) cases (**Supplementary Figure 3**). The age-stratified analyses  
134 were performed using both the additive and the recessive GWAS models, similarly  
135 as for the ‘all cases’ scenario described above, using the same set of controls.

136

### 137 Genetic correlations and disease enrichment

138 To explore the connection of female infertility with underlying disorders of female  
139 reproductive traits, we calculated both 1) genetic correlations and 2) case  
140 enrichments with our female infertility endpoints across 4 disease endpoints created  
141 and analyzed in FinnGen: ‘Endometriosis’, ‘Endometriosis ESRM stage 3 or 4’,  
142 ‘Leiomyoma of uterus’ and ‘PCOS’. A complete list of endpoints analysed in  
143 FinnGen, and their definitions is available at  
144 <https://www.finnngen.fi/en/researchers/clinical-endpoints>. We also calculated  
145 heritability estimates for both female infertility endpoints, as well as for all the four  
146 underlying disorders of female reproductive traits listed above. Summary statistics  
147 from the additive GWAS for female infertility endpoints were used to calculate  
148 genetic correlations. The genetic correlations and heritability estimates were  
149 calculated using the LDSC software.<sup>12,13</sup>

150

151 The prevalence in our female infertility cases and controls separately was calculated  
152 for the four underlying disorders of female reproductive traits, and its enrichment to  
153 cases vs. controls was calculated. P- values for the enrichments were calculated  
154 using Fisher's exact test<sup>14</sup>. In these analyses, controls were matched with cases for  
155 their birth year, since the birth year distribution of the controls and cases were  
156 significantly different.

## 157 RESULTS

### 158 GWAS results

159 To elucidate the genetic predisposition to female infertility, we performed GWAS  
160 analyses on 22,849 women affected by from infertility and 198,989 women who had  
161 given birth without a history of infertility or infertility treatment. Both a recessive and a  
162 traditional additive model were used for the analyses. The recessive GWAS  
163 pinpointed two genome-wide significant loci: one nearby *PKHD1L1*, and another at  
164 *TBPL2*. The *TBPL2* locus has not been previously associated with female infertility  
165 or any disorder associated with infertility in GWAS. In contrast, *PKHD1L1* has  
166 previously been implicated in two GWAS analyses of female infertility- we have  
167 reported a recessive association between *PKHD1L1* and female infertility<sup>8</sup>, while  
168 Venkatesh and coworkers later reported a genome-wide significant association  
169 between the locus and female infertility using an additive model<sup>7</sup>.

170

171 We next ran the additive GWAS analysis in our cohort of cases and controls and  
172 identified genome-wide significant association at four distinct loci on chromosomes  
173 1, 4, 6, and 8 near genes *WNT4*, *SULT1B1*, *ESR1*, and *PKHD1L1*, respectively.  
174 Statistical fine-mapping further identified a fifth independent significant association  
175 signal on *ESR1* locus (**Figure 1**). All these loci have previously been associated  
176 either with female infertility or with pre-existing conditions that increase the risk of  
177 female infertility, such as endometriosis, uterine fibroids, and PCOS (**Table 2**).  
178 Locuszoom plots for all significant GWS regions from both scans are available in  
179 **Supplementary Figure 4** (loci identified by the additive model) and **Supplementary**  
180 **Figure 5** (loci identified by the recessive model).

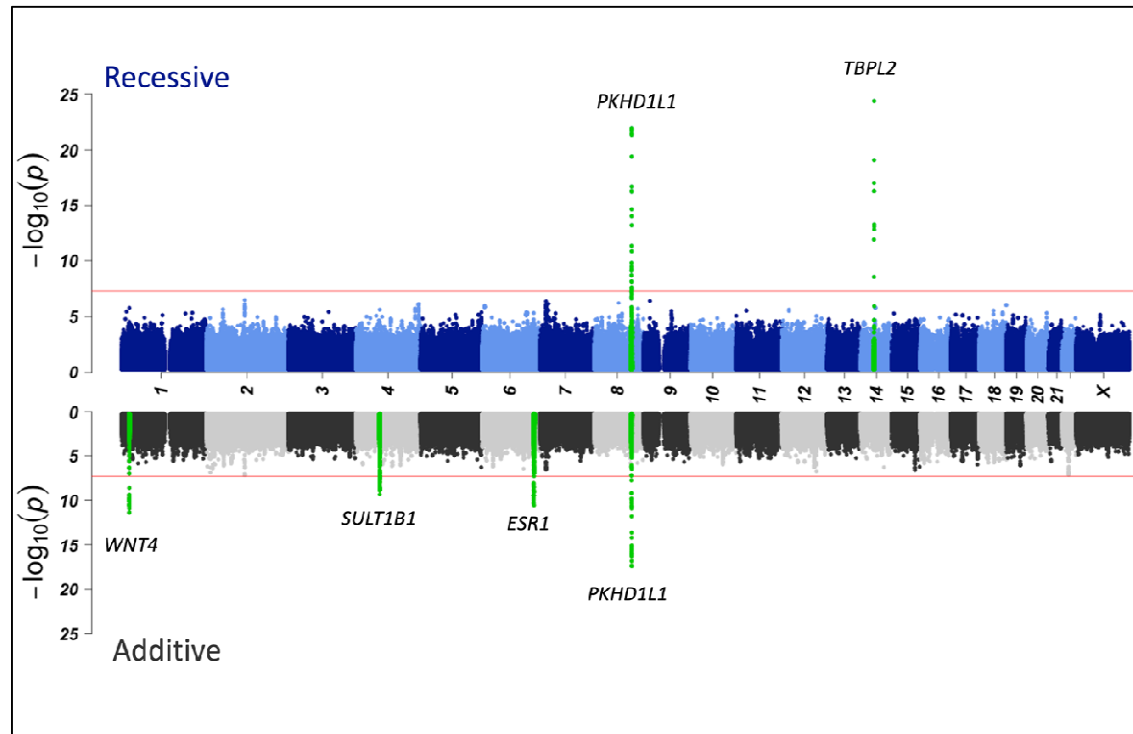

181

182 **Figure 1:** Manhattan plots for female infertility. Additive results are grey and recessive are  
183 blue dots. Genome-wide significant loci ( $\pm 500$  kB) have been highlighted with green and  
184 labeled with the nearest gene of the lead variant.

185

186 Given that the *PKHD1L1* locus yielded genome-wide significant association in both  
187 the recessive and the additive analyses, we analyzed the mode of inheritance for all  
188 identified association signals in more detail. For this purpose, we selected the lead  
189 variant (i.e. variant with the smallest p-value) at all significant loci, and plotted the  
190 proportion of affected cases in each genotype group (**Supplementary Figure 6** and  
191 **Supplementary Figure 7**). This data confirms that both the *PKHD1L1* and *TBPL2*  
192 loci exhibit a recessive mode of action, i.e. the proportion of cases with infertility is  
193 significantly elevated only among homozygous carriers of the effect allele. In  
194 contrast, at the remaining loci, the percentage of affected cases increases across the  
195 three genotype groups consistent with an additive mode of action.

196

197 **Table 2:** Independent GWAS hits and their representative variants identified by either  
 198 additive or recessive model. The lead variant from the recessive and the additive models at  
 199 the shared locus (*PKHD1L1*) are within the same credible set (LD = 1).

| SNPID<br>(rsid)                                 | Most severe<br>consequence | Nearest<br>gene | OR<br>[95% CI]          | P-value                | Maf  | Fin<br>enrichment <sup>a</sup> | Known<br>associations <sup>c</sup>     |
|-------------------------------------------------|----------------------------|-----------------|-------------------------|------------------------|------|--------------------------------|----------------------------------------|
| <b>Recessive</b>                                |                            |                 |                         |                        |      |                                |                                        |
| chr8_109459837_G_C<br>(rs17368310) <sup>b</sup> | splice donor<br>variant    | <i>PKHD1L1</i>  | 2.34<br>[1.98-2.78]     | 1.47×10 <sup>-22</sup> | 0.07 | 1.42                           | Female<br>infertility                  |
| chr14_55424219_T_A<br>(rs144313315)             | stop gained                | <i>TBPL2</i>    | 650.1<br>[190.7-2216.1] | 4.11×10 <sup>-25</sup> | 0.01 | 43.04                          | -                                      |
| <b>Additive</b>                                 |                            |                 |                         |                        |      |                                |                                        |
| chr1_22139327_T_C<br>(rs61768001)               | intron variant             | <i>WNT4</i>     | 1.10<br>[1.07-1.13]     | 4.4×10 <sup>-12</sup>  | 0.16 | 0.99                           | Endometriosis,<br>fibroids             |
| chr4_69718365_T_G<br>(rs13138435)               | downstream<br>gene variant | <i>SULT1B1</i>  | 0.93<br>0.91-0.95]      | 4.57×10 <sup>-10</sup> | 0.31 | 0.8                            | Uterine<br>leiomyomata<br>and fibroids |
| chr6_151230382_G_T<br>(rs35977392)              | upstream<br>gene variant   | <i>ESR1</i>     | 0.93<br>0.91-0.95]      | 3.97×10 <sup>-11</sup> | 0.35 | 0.88                           | Endometriosis                          |
| chr8_109459837_G_C<br>(rs17368310)              | splice donor<br>variant    | <i>PKHD1L1</i>  | 1.19<br>[1.14-1.23]     | 3.79×10 <sup>-18</sup> | 0.07 | 1.42                           | Female<br>infertility                  |

200

201 <sup>a</sup> Compared to Non-Finnish Europeans in gnomAD v3<sup>15</sup>

202 <sup>b</sup> Representative variant was changed to coding variant from lead variant chr8\_109515401\_CAAT\_C  
 203 (rs58870933),  $r^2 = 1$ .

204 <sup>c</sup> Known associations for genes have been defined from NHGRI-EBI GWAS Catalog<sup>16</sup> and previous  
 205 publications for female infertility and underlying disorders.

206

207 All three loci identified to have an additive effect showed evidence for pleiotropy, i.e.  
 208 assessment of the infertility-associated loci by PheWas of 2,460 endpoints in  
 209 FinnGen indicated association with two or more other diseases of the female

210 reproductive tract. In contrast, the two recessive loci (near *TBPL2* and *PKHD1L1*)  
211 were specifically associated only with infertility (**Table 2**).

212

### 213 *TBPL2* locus

214 The strongest association was observed in the recessive analysis at the *TBPL2*  
215 locus, with an OR of 650.1 ( $p = 4.11 \times 10^{-25}$ ). The lead variant in this locus,  
216 rs144313315 (chr14:55424219\_T/A), is a rare stop-gained mutation (p.Arg331Ter,  
217 MAF 1.1% in Finland) which is highly enriched to Finland (43 times compared to  
218 non-Finnish Europeans). The variant appears rather evenly distributed across  
219 Finland, with an allele frequency range of 0.84-2.38 % (**Supplementary Figure 8**).

220

221 Although infertility is a condition causing considerable stress to patients, most  
222 affected women will successfully conceive a child. To assess the prognosis for  
223 women carrying two copies of the *TPBL2* mutation, we analyzed the number of  
224 offspring in the entire FinnGen cohort across the *TBPL2* genotype groups. The  
225 average number of offspring among all FinnGen women with and without a history of  
226 infertility is 1.50 [SD = 1.19] vs. 1.77 [SD = 1.43], respectively. However, the average  
227 number of offspring was significantly reduced among homozygous female carriers of  
228 the p.Arg331Ter mutation. PheWAS analysis revealed a genome-wide significant  
229 recessive association between the mutation and the number of offspring ( $\beta = -1.28$   
230 SD,  $p = 4.25 \times 10^{-15}$ ) with homozygous carriers having an average of only 0.16  
231 [SD=0.58] offspring. According to the registry data, only four homozygous women for  
232 the *TBPL2* mutation had given birth, and none of them had conceived without  
233 infertility treatment (**Figure 2; Supplementary Table 1**). No such effect was

234 observed at the *PKHD1L1* locus, where the number of offspring was only slightly  
235 reduced among homozygous carriers of the minor allele (**Supplementary Figure 9**).  
236

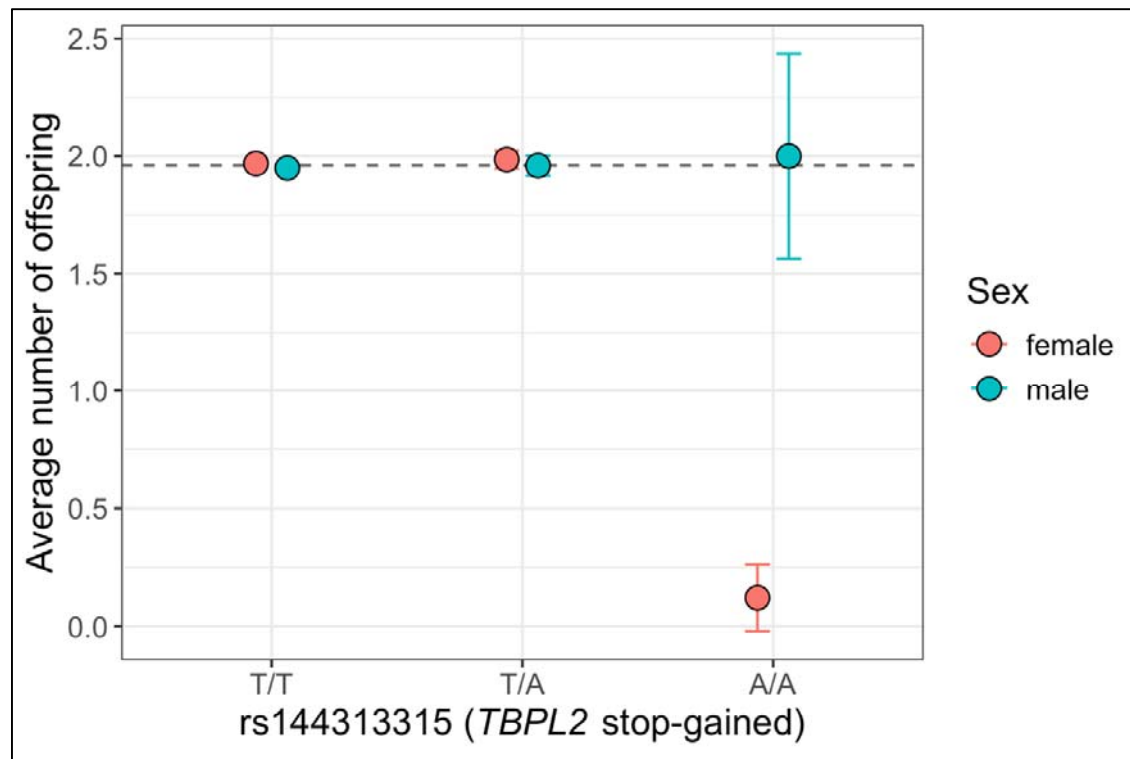

237

238 **Figure 2:** Average number of offspring for genotype groups for rs14413315 (*TBPL2* stop-  
239 gained variant) separately for females and males who have reached age 45. The dashed  
240 line represents the overall average number of offspring in FinnGen among women who have  
241 reached age 45 (=1.96).

242

243 These data indicate that the p.Arg331Ter mutation in *TPBL2* is associated with a  
244 rather severe form of infertility. These results are supported by previously published  
245 studies in mice, which reported that female mice lacking this gene are infertile female  
246 mice due to anovulation.

247

## 248 Age-stratified analysis

249 Female fertility gradually decreases with age, starting to decline more rapidly in  
250 women in their early thirties. To assess whether genetic susceptibility varies with  
251 age, we conducted age-stratified analyses. We analyzed women diagnosed with or  
252 treated for infertility below the age of 30 (early-onset) separately from those  
253 diagnosed or treated at age 30 or above (late-onset). These age-stratified analyses  
254 identified three additional genome-wide significant loci associated with infertility: two  
255 with early-onset disease near *CHEK2* and the major histocompatibility complex  
256 (MHC) region on chromosome 9, and one with late-onset disease, with the lead SNP  
257 located in an intron of the lncRNA gene ENSG00000284418 (**Supplementary**  
258 **Figure 10**)

259

260 The strongest association signal exclusively associated with early-onset infertility  
261 was a frameshift mutation, c.1100delC (rs555607708), in *CHEK2*, which previously  
262 has been shown to confer increased risk for breast and ovarian cancer. The mutation  
263 is additionally associated with leiomyoma, thyroid cancer, and myeloproliferative  
264 disorders in FinnGen. A recent study including women from FinnGen and the  
265 Estonian biobank further reported that the mutation is associated with an increased  
266 risk for PCOS (OR = 13.46 [5.68–31.89],  $p = 1.68 \times 10^{-9}$ )<sup>17</sup>

267

268 The other association signal exclusively associated with early-onset infertility was  
269 within the major histocompatibility complex (MHC) region. To pinpoint the exact  
270 location of the signal, we imputed the classical HLA alleles as well as *MICA* and  
271 *MICB*<sup>18</sup> and tested these alleles for association with our female infertility endpoints.  
272 None of the tested variants showed significant association for any of the infertility



273 endpoint tested. The complete association results of these additional association  
274 tests across the MHC region are presented in **Supplementary Table 2**.

275

## 276 Genetic correlations and case enrichments among cases

277 Given that three of the significantly associated loci detected by the primary GWAS  
278 analyses showed pleiotropic association with female reproductive system disorders,  
279 such as PCOS, endometriosis, and leiomyoma of the uterus, we next examined their  
280 genetic overlap with infertility on a genomic scale. The strongest genetic correlation  
281 ( $r_g$ ) was observed between infertility and endometriosis ( $r_g = 0.46$ ,  $p = 2.69 \times 10^{-15}$ ),  
282 with similar correlation estimates with endometriosis found among both early-onset  
283 and late-onset cases (**Supplementary Figure 11**). In contrast, although there was a  
284 significant enrichment of PCOS among women affected by infertility (**Table 3**), the  
285 genetic correlation between the two diseases was only 0.22 ( $p = 0.014$ ).  
286 Interestingly, both the genetic correlation and case enrichment with PCOS increased  
287 among early-onset cases. Heritability estimates for all analyzed female infertility-  
288 related endpoints are presented in **Supplementary Figure 12**.

289 **Table 3:** Genetic correlations with female infertility (rg) and enrichment of female infertility  
290 cases (Enrichment) among four underlying disorders for female reproduction.

| Phenotype                          | N cases | rg [95% CI]      | P-value (rg)           | Enrichment | P-value (Enr)          |
|------------------------------------|---------|------------------|------------------------|------------|------------------------|
| Endometriosis                      | 20 190  | 0.46 [0.35-0.58] | $2.69 \times 10^{-15}$ | 3.83       | $< 1 \times 10^{-324}$ |
| Endometriosis ASRM stages 3,4      | 10 127  | 0.48 [0.35-0.61] | $1.76 \times 10^{-13}$ | 5.53       | $< 1 \times 10^{-324}$ |
| Leiomyoma of uterus                | 42 107  | 0.30 [0.19-0.41] | $8.78 \times 10^{-08}$ | 1.44       | $1.01 \times 10^{-73}$ |
| Polycystic ovarian syndrome (PCOS) | 2 214   | 0.22 [0.04-0.39] | 0.014                  | 9.27       | $< 1 \times 10^{-324}$ |

291

## 292 DISCUSSION

293 Our GWAS analyses, encompassing more than 20,000 Finnish women affected by  
294 infertility and 198,000 controls, showcase a diverse landscape of associated loci.  
295 The analyses reveal that a portion of unexplained female infertility may be attributed  
296 to high-impact recessively acting disruptive mutations present at >1% frequency in  
297 the population. Specifically, our analyses point to a mutation in the Tata-box binding  
298 protein-like 2 gene (*TBPL2*), which encodes a transcription factor protein crucial for  
299 transcription initiation during oocyte growth. Based on our findings, this mutation is a  
300 significant contributor to female infertility in Finland.<sup>19</sup> The mutation introduces a  
301 premature stop codon (p.Arg331Ter) in the terminal DNA-binding part of the protein,  
302 and can hence be expected to significantly impair the transcription of the  
303 downstream targets. In our follow-up analyses, the *TBPL2* mutation was associated  
304 only with infertility and no other diseases. The variant's association with a smaller  
305 number of offspring suggests that the mutation is associated with severe infertility  
306 Prior data have indeed shown that the absence of *TBPL2* leads to oocytes failing to  
307 develop and renders female mice sterile.<sup>20</sup>

308

309 According to data from GnomAD (v3.1.2), loss-of-function mutations in *TBPL2* are  
310 rare, with the stop-gained mutation associated with infertility in this study being an  
311 exception. Apart from our findings, there are only scattered reports of coding  
312 mutations in *TBPL2* detected in women with infertility. Three reports describe  
313 homozygous and compound heterozygous stop-gained mutations (c.788+3A>G,  
314 p.Arg233Ter and c.802C>T, p.Arg268Ter) in women with infertility from four  
315 unrelated Chinese families.<sup>21,22</sup> In a fourth report, a homozygous missense mutation  
316 was linked to infertility, oocyte maturation arrest, and degradation in two sisters from

317 a consanguineous family.<sup>23</sup> Notably, all published cases have exhibited treatment-  
318 resistant primary infertility. In our study, most homozygous mutation carriers had not  
319 given birth. However, based on data from the Medical Birth Register, two out of 41  
320 carriers had given birth to one child, whereas two carriers had given birth to more  
321 than one child. All four women had undergone IVF therapy, although more detailed  
322 information on the potential use of donor oocytes is not available.

323

324 Over the past few decades, there has been a considerable shift in childbearing  
325 demographics in developed countries, characterized by more women choosing to  
326 delay childbearing.<sup>24,25</sup> Since a woman's age is one of the key factors influencing  
327 fertility, this trend has resulted in a higher average age at which women first  
328 experience infertility. This pattern is also evident in FinnGen, where we observe  
329 steadily increasing ages at first birth among women born between the 1950s and the  
330 1980s ( **Supplementary Figure 13**). Interestingly, previous research indicates  
331 that the causes of infertility may differ between older and younger women, with those  
332 over 35 years of age being nearly twice as likely to experience unexplained infertility  
333 compared to younger women.<sup>26</sup>

334

335 In support of specific age-dependent mechanisms, our GWAS analyses suggest that  
336 some associated loci indeed exert their effect in an age-dependent manner. Some  
337 loci, such as *TBPL2*, are uniformly associated with infertility in both early and late-  
338 onset cases, but we identified two loci uniquely associated with infertility only among  
339 women diagnosed before age 30, and one locus associated with late-onset disease.  
340 One of the loci associated with early-onset infertility is a frameshift alteration  
341 (c.1100delC) in the tumor suppressor gene *CHEK2*, associated with a 32% lifetime

342 risk for breast cancer.<sup>27</sup> Finding association with early-onset infertility likely reflects a  
343 link with PCOS, as the c.1100delC mutation is significantly associated with PCOS in  
344 FinnGen<sup>16</sup>, and the proportion of PCOS cases is increased among women with  
345 early-onset infertility compared to all infertility cases (0.077 vs. 0.046, respectively).

346

347 The second locus associated with the early-onset infertility was the major  
348 histocompatibility complex (MHC) region on chromosome 6. The data indicate that  
349 the association is rather sharply defined to a region between 30018523 and  
350 33018523 bp on chromosome 6, and fine-mapping analyses suggest that the signal  
351 is not associated with the classical MHC effect. The classical MHC genes encode  
352 proteins involved in antigen presentation to T cells, whereas a key function for non-  
353 classical MHC I molecules is to mediate inhibitory or activating stimuli in natural killer  
354 (NK) cells. Given that the survival of the embryo in the uterus depends on the  
355 maintenance of immune tolerance at the maternal-fetal interface, and that the  
356 pregnant uterus is predominantly populated with NK cells, one may speculate that  
357 the association findings tag an underlying mechanism that might be related to local  
358 immune tolerance.<sup>28</sup> Further functional studies are nonetheless warranted to explore  
359 and verify such an effect.

360

361 Taken together, our data point towards a unique landscape of genetic factors  
362 associated with female infertility. The results specifically highlight the significant role  
363 of recessive low-frequency variants, with the stop-gained mutation in *TBPL2*  
364 exhibiting an impact comparable to highly penetrant monogenic mutations.

## REFERENCES

1. Organization, W. H. & others. Infertility Prevalence Estimates: 1990–2021. 2023.
2. Carson, S. A. & Kallen, A. N. Diagnosis and Management of Infertility: A Review. *JAMA - Journal of the American Medical Association* vol. 326 Preprint at <https://doi.org/10.1001/jama.2021.4788> (2021).
3. Sadeghi, M. R. Unexplained infertility, the controversial matter in management of infertile couples. *Journal of Reproduction and Infertility* vol. 16 Preprint at (2015).
4. Day, F. *et al.* Large-scale genome-wide meta-analysis of polycystic ovary syndrome suggests shared genetic architecture for different diagnosis criteria. *PLoS Genet* **14**, (2018).
5. Rahmioglu, N. *et al.* The genetic basis of endometriosis and comorbidity with other pain and inflammatory conditions. *Nat Genet* **55**, (2023).
6. Gallagher, C. S. *et al.* Genome-wide association and epidemiological analyses reveal common genetic origins between uterine leiomyomata and endometriosis. *Nat Commun* **10**, (2019).
7. Venkatesh, S. S. *et al.* Genome-wide analyses identify 21 infertility loci and over 400 reproductive hormone loci across the allele frequency spectrum. *medRxiv 2023–2024* (2024).
8. Heyne, H. O. *et al.* Mono- and biallelic variant effects on disease at biobank scale. *Nature* **613**, (2023).
9. Kurki, M. I. *et al.* Author Correction: FinnGen provides genetic insights from a well-phenotyped isolated population (*Nature*, (2023), 613, 7944, (508-518),

- 10.1038/s41586-022-05473-8). *Nature* Preprint at <https://doi.org/10.1038/s41586-023-05837-8> (2023).
10. Mbatchou, J. *et al.* Computationally efficient whole-genome regression for quantitative and binary traits. *Nat Genet* **53**, (2021).
  11. Wang, G., Sarkar, A., Carbonetto, P. & Stephens, M. A simple new approach to variable selection in regression, with application to genetic fine mapping. *J R Stat Soc Series B Stat Methodol* **82**, (2020).
  12. Bulik-Sullivan, B. *et al.* LD score regression distinguishes confounding from polygenicity in genome-wide association studies. *Nat Genet* **47**, (2015).
  13. Bulik-Sullivan, B. *et al.* An atlas of genetic correlations across human diseases and traits. *Nat Genet* **47**, (2015).
  14. Fisher, R. A. On the Interpretation of  $\chi^2$  from Contingency Tables, and the Calculation of P. *Journal of the Royal Statistical Society* **85**, (1922).
  15. Karczewski, K. J. *et al.* The mutational constraint spectrum quantified from variation in 141,456 humans. *Nature* **581**, (2020).
  16. Buniello, A. *et al.* The NHGRI-EBI GWAS Catalog of published genome-wide association studies, targeted arrays and summary statistics 2019. *Nucleic Acids Res* **47**, (2019).
  17. Tyrmi, J. S. *et al.* Leveraging Northern European population history: Novel low-frequency variants for polycystic ovary syndrome. *Human Reproduction* **37**, (2022).
  18. Tammi, S. *et al.* Accurate multi-population imputation of MICA, MICB, HLA-E, HLA-F and HLA-G alleles from genome SNP data. *bioRxiv* 2023.12.05.570226 (2023) doi:10.1101/2023.12.05.570226.

19. Yu, C. *et al.* TBPL2/TFIIA complex establishes the maternal transcriptome through oocyte-specific promoter usage. *Nat Commun* **11**, (2020).
20. Gazdag, E. *et al.* TBP2 is essential for germ cell development by regulating transcription and chromatin condensation in the oocyte. *Genes Dev* **23**, (2009).
21. Du, T. *et al.* Compound heterozygous mutations in TBPL2 were identified in an infertile woman with impaired ovarian folliculogenesis. *J Assist Reprod Genet* **40**, (2023).
22. Tora, L. & Vincent, S. D. What defines the maternal transcriptome? *Biochemical Society Transactions* vol. 49 Preprint at <https://doi.org/10.1042/BST20201125> (2021).
23. Wang, Y. *et al.* A homozygous missense mutation in TBPL2 is associated with oocyte maturation arrest and degeneration. *Clin Genet* **100**, (2021).
24. Hochler, H. *et al.* The Impact of Advanced Maternal Age on Pregnancy Outcomes: A Retrospective Multicenter Study. *J Clin Med* **12**, (2023).
25. Heffner, L. J. Advanced Maternal Age — How Old Is Too Old? *New England Journal of Medicine* **351**, (2004).
26. Maheshwari, A., Hamilton, M. & Bhattacharya, S. Effect of female age on the diagnostic categories of infertility. *Human Reproduction* **23**, (2008).
27. Mars, N. *et al.* The role of polygenic risk and susceptibility genes in breast cancer over the course of life. *Nat Commun* **11**, (2020).
28. Sharma, S. Natural killer cells and regulatory T cells in early pregnancy loss. *International Journal of Developmental Biology* vol. 58 Preprint at <https://doi.org/10.1387/ijdb.140109ss> (2014).



## List of Figures

**Figure 1:** Manhattan plots for female infertility. Additive results are grey and recessive are blue dots. Genome-wide significant loci ( $\pm$  500 kB) have been highlighted with green and labeled with the nearest gene of the lead variant. .... 10

**Figure 2:** Average number of offspring for genotype groups for rs14413315 (*TBPL2* stop-gained variant) separately for females and males who have reached age 45. The dashed line represents the overall average number of offspring in FinnGen among women who have reached age 45 (=1.96)..... 13

## List of Tables

|                                                                                                                                                                                                                                                                     |    |
|---------------------------------------------------------------------------------------------------------------------------------------------------------------------------------------------------------------------------------------------------------------------|----|
| <b>Table 1:</b> Basic characteristics of the study cohort. ....                                                                                                                                                                                                     | 4  |
| <b>Table 2:</b> Independent GWAS hits and their representative variants identified by either additive or recessive model. The lead variant from the recessive and the additive models at the shared locus (PKHD1L1) are within the same credible set (LD = 1). .... | 11 |
| <b>Table 3:</b> Genetic correlations with female infertility ( $r_g$ ) and enrichment of female infertility cases (Enrichment) among four underlying disorders for female reproduction. ....                                                                        | 16 |

## Ethics statement

Study subjects in FinnGen provided informed consent for biobank research, based on the Finnish Biobank Act. Alternatively, separate research cohorts, collected prior the Finnish Biobank Act came into effect (in September 2013) and start of FinnGen (August 2017), were collected based on study-specific consents and later transferred to the Finnish biobanks after approval by Fimea (Finnish Medicines Agency), the National Supervisory Authority for Welfare and Health. Recruitment protocols followed the biobank protocols approved by Fimea. The Coordinating Ethics Committee of the Hospital District of Helsinki and Uusimaa (HUS) statement number for the FinnGen study is Nr HUS/990/2017.

The FinnGen study is approved by Finnish Institute for Health and Welfare (permit numbers: THL/2031/6.02.00/2017, THL/1101/5.05.00/2017, THL/341/6.02.00/2018, THL/2222/6.02.00/2018, THL/283/6.02.00/2019, THL/1721/5.05.00/2019 and THL/1524/5.05.00/2020), Digital and population data service agency (permit numbers: VRK43431/2017-3, VRK/6909/2018-3, VRK/4415/2019-3), the Social Insurance Institution (permit numbers: KELA 58/522/2017, KELA 131/522/2018, KELA 70/522/2019, KELA 98/522/2019, KELA 134/522/2019, KELA 138/522/2019, KELA 2/522/2020, KELA 16/522/2020), Findata permit numbers THL/2364/14.02/2020, THL/4055/14.06.00/2020, THL/3433/14.06.00/2020, THL/4432/14.06/2020, THL/5189/14.06/2020, THL/5894/14.06.00/2020, THL/6619/14.06.00/2020, THL/209/14.06.00/2021, THL/688/14.06.00/2021, THL/1284/14.06.00/2021, THL/1965/14.06.00/2021, THL/5546/14.02.00/2020, THL/2658/14.06.00/2021, THL/4235/14.06.00/2021, Statistics Finland (permit numbers: TK-53-1041-17 and TK/143/07.03.00/2020 (earlier TK-53-90-20)

TK/1735/07.03.00/2021, TK/3112/07.03.00/2021) and Finnish Registry for Kidney Diseases permission/extract from the meeting minutes on 4th July 2019.

The Biobank Access Decisions for FinnGen samples and data utilized in FinnGen Data Freeze 11 include: THL Biobank BB2017\_55, BB2017\_111, BB2018\_19, BB\_2018\_34, BB\_2018\_67, BB2018\_71, BB2019\_7, BB2019\_8, BB2019\_26, BB2020\_1, BB2021\_65, Finnish Red Cross Blood Service Biobank 7.12.2017, Helsinki Biobank HUS/359/2017, HUS/248/2020, HUS/430/2021 §28, §29, HUS/150/2022 §12, §13, §14, §15, §16, §17, §18, §23, §58, §59, HUS/128/2023 §18, Auria Biobank AB17-5154 and amendment #1 (August 17 2020) and amendments BB\_2021-0140, BB\_2021-0156 (August 26 2021, Feb 2 2022), BB\_2021-0169, BB\_2021-0179, BB\_2021-0161, AB20-5926 and amendment #1 (April 23 2020) and it's modifications (Sep 22 2021), BB\_2022-0262, BB\_2022-0256, Biobank Borealis of Northern Finland\_2017\_1013, 2021\_5010, 2021\_5010 Amendment, 2021\_5018, 2021\_5018 Amendment, 2021\_5015, 2021\_5015 Amendment, 2021\_5015 Amendment\_2, 2021\_5023, 2021\_5023 Amendment, 2021\_5023 Amendment\_2, 2021\_5017, 2021\_5017 Amendment, 2022\_6001, 2022\_6001 Amendment, 2022\_6006 Amendment, 2022\_6006 Amendment, 2022\_6006 Amendment\_2, BB22-0067, 2022\_0262, 2022\_0262 Amendment, Biobank of Eastern Finland 1186/2018 and amendment 22§/2020, 53§/2021, 13§/2022, 14§/2022, 15§/2022, 27§/2022, 28§/2022, 29§/2022, 33§/2022, 35§/2022, 36§/2022, 37§/2022, 39§/2022, 7§/2023, 32§/2023, 33§/2023, 34§/2023, 35§/2023, 36§/2023, 37§/2023, 38§/2023, 39§/2023, 40§/2023, 41§/2023, Finnish Clinical Biobank Tampere MH0004 and amendments (21.02.2020 & 06.10.2020), BB2021-0140 8§/2021, 9§/2021, §9/2022, §10/2022, §12/2022, 13§/2022, §20/2022,

§21/2022, §22/2022, §23/2022, 28§/2022, 29§/2022, 30§/2022, 31§/2022, 32§/2022, 38§/2022, 40§/2022, 42§/2022, 1§/2023, Central Finland Biobank 1-2017, BB\_2021-0161, BB\_2021-0169, BB\_2021-0179, BB\_2021-0170, BB\_2022-0256, BB\_2022-0262, BB22-0067, Decision allowing to continue data processing until 31st Aug 2024 for projects: BB\_2021-0179, BB22-0067, BB\_2022-0262, BB\_2021-0170, BB\_2021-0164, BB\_2021-0161, and BB\_2021-0169, and Terveystalo Biobank STB 2018001 and amendment 25th Aug 2020, Finnish Hematological Registry and Clinical Biobank decision 18th June 2021, Arctic biobank P0844: ARC\_2021\_1001.

## Declaration of interests

The authors declare no competing interests.

## Data and code availability

Individual level data: The Finnish biobank data can be accessed through the Fingenious® services (<https://site.fingenious.fi/en/>) managed by FINBB. Finnish Health register data can be applied from Findata (<https://findata.fi/en/data/>).

Summary statistics: Summary statistics from each data release will be made publicly available after a one year embargo period and can be accessed freely from: [www.finngen.fi/en/access\\_results](http://www.finngen.fi/en/access_results).

## Acknowledgements

We want to acknowledge the participants and investigators of the FinnGen study. The FinnGen project is funded by two grants from Business Finland (HUS 4685/31/2016 and UH 4386/31/2016) and the following industry partners: AbbVie Inc., AstraZeneca UK Ltd, Biogen MA Inc., Bristol Myers Squibb (and Celgene Corporation & Celgene International II Sàrl), Genentech Inc., Merck Sharp & Dohme LCC, Pfizer Inc., GlaxoSmithKline Intellectual Property Development Ltd., Sanofi US Services Inc., Maze Therapeutics Inc., Janssen Biotech Inc, Novartis AG, and Boehringer Ingelheim International GmbH. Following biobanks are acknowledged for delivering biobank samples to FinnGen: Auria Biobank ([www.auria.fi/biopankki](http://www.auria.fi/biopankki)), THL Biobank ([www.thl.fi/biobank](http://www.thl.fi/biobank)), Helsinki Biobank ([www.helsinginbiopankki.fi](http://www.helsinginbiopankki.fi)), Biobank Borealis of Northern Finland (<https://www.ppsHP.fi/Tutkimus-ja-opetus/Biopankki/Pages/Biobank-Borealis-briefly-in-English.aspx>), Finnish Clinical Biobank Tampere ([www.tays.fi/en-US/Research\\_and\\_development/Finnish\\_Clinical\\_Biobank\\_Tampere](http://www.tays.fi/en-US/Research_and_development/Finnish_Clinical_Biobank_Tampere)), Biobank of Eastern Finland ([www.ita-suomenbiopankki.fi/en](http://www.ita-suomenbiopankki.fi/en)), Central Finland Biobank ([www.kssHP.fi/fi-FI/Potilaalle/Biopankki](http://www.kssHP.fi/fi-FI/Potilaalle/Biopankki)), Finnish Red Cross Blood Service Biobank ([www.veripalvelu.fi/verenluovutus/biopankkitoiminta](http://www.veripalvelu.fi/verenluovutus/biopankkitoiminta)), Terveystalo Biobank ([www.terveystalo.com/fi/Yritystietoa/Terveystalo-Biopankki/Biopankki/](http://www.terveystalo.com/fi/Yritystietoa/Terveystalo-Biopankki/Biopankki/)) and Arctic Biobank (<https://www.oulu.fi/en/university/faculties-and-units/faculty-medicine/northern-finland-birth-cohorts-and-arctic-biobank>). All Finnish Biobanks are members of BBMRI.fi infrastructure (<https://www.bbmri-eric.eu/national-nodes/finland/>). Finnish Biobank Cooperative -FINBB (<https://finbb.fi/>) is the coordinator of BBMRI-ERIC operations in Finland. The Finnish biobank data can be



accessed through the Fingenious® services (<https://site.fingenious.fi/en/>) managed by FINBB.

## Full list of FinnGen authors

| Full Name           | Affiliation                                                                                                                                                                     | E-mail                                |
|---------------------|---------------------------------------------------------------------------------------------------------------------------------------------------------------------------------|---------------------------------------|
| Aarno Palotie       | Institute for Molecular Medicine Finland (FIMM),<br>HiLIFE, University of Helsinki, Helsinki, Finland;<br>Broad Institute of MIT and Harvard; Massachusetts<br>General Hospital | aarno.palotie@helsinki.fi             |
| Mark Daly           | Institute for Molecular Medicine Finland (FIMM),<br>HiLIFE, University of Helsinki, Helsinki, Finland;<br>Broad Institute of MIT and Harvard; Massachusetts<br>General Hospital | mark.daly@helsinki.fi                 |
| Bridget Riley-Gills | Abbvie, Chicago, IL, United States                                                                                                                                              | bridget.rileygillis@abbvie.com        |
| Howard Jacob        | Abbvie, Chicago, IL, United States                                                                                                                                              | howard.jacob@abbvie.com               |
| Dirk Paul           | Astra Zeneca, Cambridge, United Kingdom                                                                                                                                         | dirk.paul@astrazeneca.com             |
| Slavé Petrovski     | Astra Zeneca, Cambridge, United Kingdom                                                                                                                                         | slav.petrovski@astrazeneca.com        |
| Heiko Runz          | Biogen, Cambridge, MA, United States                                                                                                                                            | heiko.runz@biogen.com                 |
| Sally John          | Biogen, Cambridge, MA, United States                                                                                                                                            | sally.john@biogen.com                 |
| George Okafo        | Boehringer Ingelheim, Ingelheim am Rhein,<br>Germany                                                                                                                            | george.okafo@boehringer-ingenheim.com |
| Robert Plenge       | Bristol Myers Squibb, New York, NY, United States                                                                                                                               | robert.plenge@bms.com                 |
| Joseph Maranville   | Bristol Myers Squibb, New York, NY, United States                                                                                                                               | joseph.maranville@bms.com             |
| Mark McCarthy       | Genentech, San Francisco, CA, United States                                                                                                                                     | mccarthy.mark@gene.com                |
| Margaret G. Ehm     | GlaxoSmithKline, Collegeville, PA, United States                                                                                                                                | meg.g.ehm@gsk.com                     |
| Kirsi Auro          | GlaxoSmithKline, Espoo, Finland                                                                                                                                                 | kirsi.m.auro@gsk.com                  |
| Simonne Longerich   | Merck, Kenilworth, NJ, United States                                                                                                                                            | simonne.longerich@merck.com           |
| Anders Målarstig    | Pfizer, New York, NY, United States                                                                                                                                             | anders.malarstig@pfizer.com           |
| Katherine Klinger   | Translational Sciences, Sanofi R&D, Framingham,<br>MA, USA                                                                                                                      | katherine.klinger@sanofi.com          |
| Clement Chatelain   | Translational Sciences, Sanofi R&D, Framingham,<br>MA, USA                                                                                                                      | clement.chatelain@sanofi.com          |
| Matthias Gossel     | Translational Sciences, Sanofi R&D, Framingham,<br>MA, USA                                                                                                                      | matthias.gossel@sanofi.com            |
| Karol Estrada       | Maze Therapeutics, San Francisco, CA, United<br>States                                                                                                                          | kestrada@mazetx.com                   |
| Robert Graham       | Maze Therapeutics, San Francisco, CA, United<br>States                                                                                                                          | rgraham@mazetx.com                    |
| Dawn Waterworth     | Janssen Research & Development, LLC, Spring<br>House, PA, United States                                                                                                         | dwaterwo@its.jnj.com                  |

|                  |                                                                                                                       |                                 |
|------------------|-----------------------------------------------------------------------------------------------------------------------|---------------------------------|
| Chris O'Donnell  | Novartis Institutes for BioMedical Research,<br>Cambridge, MA, United States                                          | chris.odonnell@novartis.com     |
| Nicole Renaud    | Novartis Institutes for BioMedical Research,<br>Cambridge, MA, United States                                          | nicole.renaud@novartis.com      |
| Tomi P. Mäkelä   | HiLIFE, University of Helsinki, Finland, Finland                                                                      | tomi.makela@helsinki.fi         |
| Jaakko Kaprio    | Institute for Molecular Medicine Finland (FIMM),<br>HiLIFE, University of Helsinki, Helsinki, Finland                 | jaakko.kaprio@helsinki.fi       |
| Petri Virolainen | Auria Biobank / University of Turku / Hospital<br>District of Southwest Finland, Turku, Finland                       | petri.virolainen@tyks.fi        |
| Antti Hakanen    | Auria Biobank / University of Turku / Hospital<br>District of Southwest Finland, Turku, Finland                       | antti.hakanen@tyks.fi           |
| Terhi Kilpi      | THL Biobank / Finnish Institute for Health and<br>Welfare (THL), Helsinki, Finland                                    | terhi.kilpi@thl.fi              |
| Markus Perola    | THL Biobank / Finnish Institute for Health and<br>Welfare (THL), Helsinki, Finland                                    | markus.perola@thl.fi            |
| Jukka Partanen   | Finnish Red Cross Blood Service / Finnish<br>Hematology Registry and Clinical Biobank,<br>Helsinki, Finland           | jukka.partanen@veripalvelu.fi   |
| Anne Pitkäranta  | Helsinki Biobank / Helsinki University and Hospital<br>District of Helsinki and Uusimaa, Helsinki                     | anne.pitkaranta@hus.fi          |
| Taneli Raivio    | Helsinki Biobank / Helsinki University and Hospital<br>District of Helsinki and Uusimaa, Helsinki                     | taneli.raivio@hus.fi            |
| Jani Tikkanen    | Northern Finland Biobank Borealis / University of<br>Oulu / Northern Ostrobothnia Hospital District,<br>Oulu, Finland | jani.tikkanen@ppshp.fi          |
| Raisa Serpi      | Northern Finland Biobank Borealis / University of<br>Oulu / Northern Ostrobothnia Hospital District,<br>Oulu, Finland | raisa.serpi@ppshp.fi            |
| Tarja Laitinen   | Finnish Clinical Biobank Tampere / University of<br>Tampere / Pirkanmaa Hospital District, Tampere,<br>Finland        | tarja.laitinen@pshp.fi          |
| Veli-Matti Kosma | Biobank of Eastern Finland / University of Eastern<br>Finland / Northern Savo Hospital District, Kuopio,<br>Finland   | veli-matti.kosma@uef.fi         |
| Jari Laukkanen   | Central Finland Biobank / University of Jyväskylä /<br>Central Finland Health Care District, Jyväskylä,<br>Finland    | jari.laukkanen@ksshp.fi         |
| Marco Hautalahti | FINBB - Finnish biobank cooperative                                                                                   | marco.hautalahti@finbb.fi       |
| Outi Tuovila     | Business Finland, Helsinki, Finland                                                                                   | outi.tuovila@businessfinland.fi |

|                         |                                                                           |                                           |
|-------------------------|---------------------------------------------------------------------------|-------------------------------------------|
| Raimo Pakkanen          | Business Finland, Helsinki, Finland                                       | raimo.pakkanen@businessfinland.fi         |
| Jeffrey Waring          | Abbvie, Chicago, IL, United States                                        | jeff.waring@abbvie.com                    |
| Bridget Riley-Gillis    | Abbvie, Chicago, IL, United States                                        | bridget.rileygillis@abbvie.com            |
| Fedik Rahimov           | Abbvie, Chicago, IL, United States                                        | fedik.rahimov@abbvie.com                  |
| Ioanna Tachmazidou      | Astra Zeneca, Cambridge, United Kingdom                                   | ioanna.tachmazidou@astrazeneca.com        |
| Chia-Yen Chen           | Biogen, Cambridge, MA, United States                                      | chiayen.chen@biogen.com                   |
| Heiko Runz              | Biogen, Cambridge, MA, United States                                      | heiko.runz@biogen.com                     |
| Zhihao Ding             | Boehringer Ingelheim, Ingelheim am Rhein, Germany                         | zhihao.ding@boehringer-ingelheim.com      |
| Marc Jung               | Boehringer Ingelheim, Ingelheim am Rhein, Germany                         | marc_oliver.jung@boehringer-ingelheim.com |
| Hanati Tuoken           | Boehringer Ingelheim, Ingelheim am Rhein, Germany                         | hanati.tuoken@boehringer-ingelheim.com    |
| Shameek Biswas          | Bristol Myers Squibb, New York, NY, United States                         | Shameek.Biswas@bms.com                    |
| Rion Pendergrass        | Genentech, San Francisco, CA, United States                               | penders2@gene.com                         |
| Margaret G. Ehm         | GlaxoSmithKline, Collegeville, PA, United States                          | meg.g.ehm@gsk.com                         |
| David Pulford           | GlaxoSmithKline, Stevenage, United Kingdom                                | david.x.pulford@gsk.com                   |
| Neha Raghavan           | Merck, Kenilworth, NJ, United States                                      | neha.raghavan@merck.com                   |
| Adriana Huertas-Vazquez | Merck, Kenilworth, NJ, United States                                      | adriana.huertas.vazquez@merck.com         |
| Jae-Hoon Sul            | Merck, Kenilworth, NJ, United States                                      | jae.hoon.sul@merck.com                    |
| Anders Målarstig        | Pfizer, New York, NY, United States                                       | anders.malarstig@pfizer.com               |
| Xinli Hu                | Pfizer, New York, NY, United States                                       | xinli.hu@pfizer.com                       |
| Åsa Hedman              | Pfizer, New York, NY, United States                                       | asa.hedman@pfizer.com                     |
| Katherine Klinger       | Translational Sciences, Sanofi R&D, Framingham, MA, USA                   | katherine.klinger@sanofi.com              |
| Robert Graham           | Maze Therapeutics, San Francisco, CA, United States                       | rgraham@mazetx.com                        |
| Manuel Rivas            | Maze Therapeutics, San Francisco, CA, United States                       | mrivas@mazetx.com                         |
| Dawn Waterworth         | Janssen Research & Development, LLC, Spring House, PA, United States      | dwaterwo@its.jnj.com                      |
| Nicole Renaud           | Novartis Institutes for BioMedical Research, Cambridge, MA, United States | nicole.renaud@novartis.com                |
| Ma'en Obeidat           | Novartis Institutes for BioMedical Research, Cambridge, MA, United States | maen.obeidat@novartis.com                 |
| Jonathan Chung          | Novartis Institutes for BioMedical Research, Cambridge, MA, United States | jonathan.chung@novartis.com               |
| Jonas Zierer            | Novartis Institutes for BioMedical Research, Cambridge, MA, United States | jonas.zierer@novartis.com                 |

|                       |                                                                                                                       |                               |
|-----------------------|-----------------------------------------------------------------------------------------------------------------------|-------------------------------|
| Mari Niemi            | Novartis Institutes for BioMedical Research,<br>Cambridge, MA, United States                                          | mari.niemi@novartis.com       |
| Samuli Ripatti        | Institute for Molecular Medicine Finland (FIMM),<br>HiLIFE, University of Helsinki, Helsinki, Finland                 | samuli.ripatti@helsinki.fi    |
| Johanna Schleutker    | Auria Biobank / Univ. of Turku / Hospital District of<br>Southwest Finland, Turku, Finland                            | johanna.schleutker@utu.fi     |
| Markus Perola         | THL Biobank / Finnish Institute for Health and<br>Welfare (THL), Helsinki, Finland                                    | markus.perola@thl.fi          |
| Mikko Arvas           | Finnish Red Cross Blood Service / Finnish<br>Hematology Registry and Clinical Biobank,<br>Helsinki, Finland           | mikko.arvas@veripalvelu.fi    |
| Olli Carpén           | Helsinki Biobank / Helsinki University and Hospital<br>District of Helsinki and Uusimaa, Helsinki                     | olli.carpén@helsinki.fi       |
| Reetta Hinttala       | Northern Finland Biobank Borealis / University of<br>Oulu / Northern Ostrobothnia Hospital District,<br>Oulu, Finland | reetta.hinttala@oulu.fi       |
| Johannes Kettunen     | Northern Finland Biobank Borealis / University of<br>Oulu / Northern Ostrobothnia Hospital District,<br>Oulu, Finland | johannes.kettunen@oulu.fi     |
| Arto Mannermaa        | Biobank of Eastern Finland / University of Eastern<br>Finland / Northern Savo Hospital District, Kuopio,<br>Finland   | arto.mannermaa@uef.fi         |
| Katriina Aalto-Setälä | Faculty of Medicine and Health Technology,<br>Tampere University, Tampere, Finland                                    | katriina.aalto-setala@tuni.fi |
| Mika Kähönen          | Finnish Clinical Biobank Tampere / University of<br>Tampere / Pirkanmaa Hospital District, Tampere,<br>Finland        | mika.kahonen@uta.fi           |
| Jari Laukkanen        | Central Finland Biobank / University of Jyväskylä /<br>Central Finland Health Care District, Jyväskylä,<br>Finland    | jari.laukkanen@ksshp.fi       |
| Johanna Mäkelä        | FINBB - Finnish biobank cooperative                                                                                   | johanna.makela@finbb.fi       |
| Reetta Kälviäinen     | Northern Savo Hospital District, Kuopio, Finland                                                                      | reetta.kalviainen@kuh.fi      |
| Valtteri Julkunen     | Northern Savo Hospital District, Kuopio, Finland                                                                      | valtteri.julkunen@kuh.fi      |
| Hilkka Soininen       | Northern Savo Hospital District, Kuopio, Finland                                                                      | hilkka.soininen@uef.fi        |
| Anne Remes            | Northern Ostrobothnia Hospital District, Oulu,<br>Finland                                                             | anne.remes@oulu.fi            |
| Mikko Hiltunen        | University of Eastern Finland, Kuopio, Finland                                                                        | mikko.hiltunen@uef.fi         |
| Jukka Peltola         | Pirkanmaa Hospital District, Tampere, Finland                                                                         | jukka.peltola@pshp.fi         |
| Minna Raivio          | Hospital District of Helsinki and Uusimaa, Helsinki,                                                                  | minna.raivio@geri.fi          |

|                      |                                                                                      |                             |
|----------------------|--------------------------------------------------------------------------------------|-----------------------------|
|                      | Finland                                                                              |                             |
| Pentti Tienari       | Hospital District of Helsinki and Uusimaa, Helsinki,<br>Finland                      | pentti.tienari@hus.fi       |
| Juha Rinne           | Hospital District of Southwest Finland, Turku,<br>Finland                            | juha.rinne@tyks.fi          |
| Roosa Kallionpää     | Hospital District of Southwest Finland, Turku,<br>Finland                            | roosa.kallionpaa@tyks.fi    |
| Juulia Partanen      | Institute for Molecular Medicine Finland, HiLIFE,<br>University of Helsinki, Finland | juulia.partanen@helsinki.fi |
| Adam Ziemann         | Abbvie, Chicago, IL, United States                                                   | adam.ziemann@abbvie.com     |
| Nizar Smaoui         | Abbvie, Chicago, IL, United States                                                   | nizar.smaoui@abbvie.com     |
| Anne Lehtonen        | Abbvie, Chicago, IL, United States                                                   | anne.lehtonen@abbvie.com    |
| Susan Eaton          | Biogen, Cambridge, MA, United States                                                 | susan.eaton@biogen.com      |
| Heiko Runz           | Biogen, Cambridge, MA, United States                                                 | heiko.runz@biogen.com       |
| Sanni Lahdenperä     | Biogen, Cambridge, MA, United States                                                 | sanni.lahdenpera@biogen.com |
| Shameek Biswas       | Bristol Myers Squibb, New York, NY, United States                                    | shameek.biswas@bms.com      |
| Natalie Bowers       | Genentech, San Francisco, CA, United States                                          | bowersn1@gene.com           |
| Edmond Teng          | Genentech, San Francisco, CA, United States                                          | teng.edmond@gene.com        |
| Rion Pendergrass     | Genentech, San Francisco, CA, United States                                          | penders2@gene.com           |
| Fanli Xu             | GlaxoSmithKline, Brentford, United Kingdom                                           | chun-fang.2.xu@gsk.com      |
| David Pulford        | GlaxoSmithKline, Stevenage, United Kingdom                                           | david.x.pulford@gsk.com     |
| Kirsi Auro           | GlaxoSmithKline, Espoo, Finland                                                      | kirsi.m.auro@gsk.com        |
| Laura Addis          | GlaxoSmithKline, Brentford, United Kingdom                                           | laura.x.addis@gsk.com       |
| John Eicher          | GlaxoSmithKline, Brentford, United Kingdom                                           | john.d.eicher@gsk.com       |
| Qingqin S Li         | Janssen Research & Development, LLC, Titusville,<br>NJ 08560, United States          | QLi2@its.jnj.com            |
| Karen He             | Janssen Research & Development, LLC, Spring<br>House, PA, United States              | khe2@its.jnj.com            |
| Ekaterina Khramtsova | Janssen Research & Development, LLC, Spring<br>House, PA, United States              | ekhrants@its.jnj.com        |
| Neha Raghavan        | Merck, Kenilworth, NJ, United States                                                 | neha.raghavan@merck.com     |
| Martti Färkkilä      | Hospital District of Helsinki and Uusimaa, Helsinki,<br>Finland                      | martti.farkkila@hus.fi      |
| Jukka Koskela        | Hospital District of Helsinki and Uusimaa, Helsinki,<br>Finland                      | jukka.koskela@helsinki.fi   |
| Sampsa Pikkarainen   | Hospital District of Helsinki and Uusimaa, Helsinki,<br>Finland                      | sampsa.pikkarainen@hus.fi   |
| Airi Jussila         | Pirkanmaa Hospital District, Tampere, Finland                                        | airi.jussila@pshp.fi        |
| Katri Kaukinen       | Pirkanmaa Hospital District, Tampere, Finland                                        | katri.kaukinen@tuni.fi      |

|                         |                                                                                                                                                                         |                                             |
|-------------------------|-------------------------------------------------------------------------------------------------------------------------------------------------------------------------|---------------------------------------------|
| Timo Blomster           | Northern Ostrobothnia Hospital District, Oulu, Finland                                                                                                                  | timo.blomster@ppshp.fi                      |
| Mikko Kiviniemi         | Northern Savo Hospital District, Kuopio, Finland                                                                                                                        | mikko.kiviniemi@kuh.fi                      |
| Markku Voutilainen      | Hospital District of Southwest Finland, Turku, Finland                                                                                                                  | markku.voutilainen@tyks.fi                  |
| Mark Daly               | Institute for Molecular Medicine, Finland (FIMM), HiLIFE, University of Helsinki, Helsinki, Finland; Broad Institute of MIT and Harvard; Massachusetts General Hospital | mark.daly@helsinki.fi                       |
| Jeffrey Waring          | Abbvie, Chicago, IL, United States                                                                                                                                      | jeff.waring@abbvie.com                      |
| Nizar Smaoui            | Abbvie, Chicago, IL, United States                                                                                                                                      | nizar.smaoui@abbvie.com                     |
| Fedik Rahimov           | Abbvie, Chicago, IL, United States                                                                                                                                      | fedik.rahimov@abbvie.com                    |
| Anne Lehtonen           | Abbvie, Chicago, IL, United States                                                                                                                                      | anne.lehtonen@abbvie.com                    |
| Tim Lu                  | Genentech, San Francisco, CA, United States                                                                                                                             | lut8@gene.com                               |
| Natalie Bowers          | Genentech, San Francisco, CA, United States                                                                                                                             | bowersn1@gene.com                           |
| Rion Pendergrass        | Genentech, San Francisco, CA, United States                                                                                                                             | penders2@gene.com                           |
| Linda McCarthy          | GlaxoSmithKline, Brentford, United Kingdom                                                                                                                              | linda.c.mccarthy@gsk.com                    |
| Amy Hart                | Janssen Research & Development, LLC, Spring House, PA, United States                                                                                                    | ahart13@its.jnj.com                         |
| Meijian Guan            | Janssen Research & Development, LLC, Spring House, PA, United States                                                                                                    | mguan4@its.jnj.com                          |
| Jason Miller            | Merck, Kenilworth, NJ, United States                                                                                                                                    | jason.miller4@merck.com                     |
| Kirsi Kalpala           | Pfizer, New York, NY, United States                                                                                                                                     | kirsi.kalpala@pfizer.com                    |
| Melissa Miller          | Pfizer, New York, NY, United States                                                                                                                                     | melissa.r.miller@pfizer.com                 |
| Xinli Hu                | Pfizer, New York, NY, United States                                                                                                                                     | xinli.hu@pfizer.com                         |
| Kari Eklund             | Hospital District of Helsinki and Uusimaa, Helsinki, Finland                                                                                                            | kari.eklund@hus.fi                          |
| Antti Palomäki          | Hospital District of Southwest Finland, Turku, Finland                                                                                                                  | ajpalo@utu.fi                               |
| Pia Isomäki             | Pirkanmaa Hospital District, Tampere, Finland                                                                                                                           | pia.isomaki@pshp.fi                         |
| Laura Pirilä            | Hospital District of Southwest Finland, Turku, Finland                                                                                                                  | laura.pirila@fimnet.fi,laura.pirila@tyks.fi |
| Oili Kaipainen-Seppänen | Northern Savo Hospital District, Kuopio, Finland                                                                                                                        | oili.kaipainen-seppanen@kuh.fi              |
| Johanna Huhtakangas     | Northern Ostrobothnia Hospital District, Oulu, Finland                                                                                                                  | johanna.huhtakangas@kuh.fi                  |
| Nina Mars               | Institute for Molecular Medicine Finland (FIMM), HiLIFE, University of Helsinki, Helsinki, Finland                                                                      | nina.mars@helsinki.fi                       |
| Jeffrey Waring          | Abbvie, Chicago, IL, United States                                                                                                                                      | jeff.waring@abbvie.com                      |
| Fedik Rahimov           | Abbvie, Chicago, IL, United States                                                                                                                                      | fedik.rahimov@abbvie.com                    |

|                        |                                                                                                                                          |                                  |
|------------------------|------------------------------------------------------------------------------------------------------------------------------------------|----------------------------------|
| Apinya Lertratanakul   | Abbvie, Chicago, IL, United States                                                                                                       | apinya.lertratanakul@abbvie.com  |
| Nizar Smaoui           | Abbvie, Chicago, IL, United States                                                                                                       | nizar.smaoui@abbvie.com          |
| Anne Lehtonen          | Abbvie, Chicago, IL, United States                                                                                                       | anne.lehtonen@abbvie.com         |
| Coralie Viollet        | AstraZeneca, Cambridge, United Kingdom                                                                                                   | coralie.viollet@astrazeneca.com  |
| Marla Hochfeld         | Bristol Myers Squibb, New York, NY, United States                                                                                        | mhochfeld@celgene.com            |
| Natalie Bowers         | Genentech, San Francisco, CA, United States                                                                                              | bowersn1@gene.com                |
| Rion Pendergrass       | Genentech, San Francisco, CA, United States                                                                                              | penders2@gene.com                |
| Jorge Esparza Gordillo | GlaxoSmithKline, Brentford, United Kingdom                                                                                               | jorge.x.esparza-gordillo@gsk.com |
| Kirsi Auro             | GlaxoSmithKline, Espoo, Finland                                                                                                          | kirsi.m.auro@gsk.com             |
| Dawn Waterworth        | Janssen Research & Development, LLC, Spring House, PA, United States                                                                     | dwaterwo@its.jnj.com             |
| Fabiana Farias         | Merck, Kenilworth, NJ, United States                                                                                                     | fabiana.farias@merck.com         |
| Kirsi Kalpala          | Pfizer, New York, NY, United States                                                                                                      | kirsi.kalpala@pfizer.com         |
| Nan Bing               | Pfizer, New York, NY, United States                                                                                                      | nan.bing@pfizer.com              |
| Xinli Hu               | Pfizer, New York, NY, United States                                                                                                      | xinli.hu@pfizer.com              |
| Tarja Laitinen         | Pirkanmaa Hospital District, Tampere, Finland                                                                                            | tarja.laitinen@pshp.fi           |
| Margit Pelkonen        | Northern Savo Hospital District, Kuopio, Finland                                                                                         | margit.pelkonen@kuh.fi           |
| Paula Kauppi           | Hospital District of Helsinki and Uusimaa, Helsinki, Finland                                                                             | paula.kauppi@hus.fi              |
| Hannu Kankaanranta     | University of Gothenburg, Gothenburg, Sweden/<br>Seinäjoki Central Hospital, Seinäjoki, Finland/<br>Tampere University, Tampere, Finland | hannu.kankaanranta@tuni.fi       |
| Terttu Harju           | Northern Ostrobothnia Hospital District, Oulu, Finland                                                                                   | terttu.harju@oulu.fi             |
| Riitta Lahesmaa        | Hospital District of Southwest Finland, Turku, Finland                                                                                   | rilahes@utu.fi                   |
| Nizar Smaoui           | Abbvie, Chicago, IL, United States                                                                                                       | nizar.smaoui@abbvie.com          |
| Coralie Viollet        | AstraZeneca, Cambridge, United Kingdom                                                                                                   | coralie.viollet@astrazeneca.com  |
| Susan Eaton            | Biogen, Cambridge, MA, United States                                                                                                     | susan.eaton@biogen.com           |
| Hubert Chen            | Genentech, San Francisco, CA, United States                                                                                              | chenh37@gene.com                 |
| Rion Pendergrass       | Genentech, San Francisco, CA, United States                                                                                              | penders2@gene.com                |
| Natalie Bowers         | Genentech, San Francisco, CA, United States                                                                                              | bowersn1@gene.com                |
| Joanna Betts           | GlaxoSmithKline, Brentford, United Kingdom                                                                                               | joanna.c.betts@gsk.com           |
| Kirsi Auro             | GlaxoSmithKline, Espoo, Finland                                                                                                          | kirsi.m.auro@gsk.com             |
| Rajashree Mishra       | GlaxoSmithKline, Brentford, United Kingdom                                                                                               | rajashree.x.mishra@gsk.com       |
| Majd Mouded            | Novartis, Basel, Switzerland                                                                                                             | majd.mouded@novartis.com         |
| Debby Ngo              | Novartis, Basel, Switzerland                                                                                                             | debby.ngo@novartis.com           |
| Teemu Niiranen         | Finnish Institute for Health and Welfare (THL), Helsinki, Finland                                                                        | teemu.niiranen@thl.fi            |



|                       |                                                                                                                                                                                                         |                                   |
|-----------------------|---------------------------------------------------------------------------------------------------------------------------------------------------------------------------------------------------------|-----------------------------------|
| Felix Vaura           | Finnish Institute for Health and Welfare (THL),<br>Helsinki, Finland                                                                                                                                    | fehva@utu.fi                      |
| Veikko Salomaa        | Finnish Institute for Health and Welfare (THL),<br>Helsinki, Finland                                                                                                                                    | veikko.salomaa@thl.fi             |
| Kaj Metsärinne        | Hospital District of Southwest Finland, Turku,<br>Finland                                                                                                                                               | kaj.metsarinne@tyks.fi            |
| Jenni Aittokallio     | Hospital District of Southwest Finland, Turku,<br>Finland                                                                                                                                               | jemato@utu.fi                     |
| Mika Kähönen          | Pirkanmaa Hospital District, Tampere, Finland                                                                                                                                                           | mika.kahonen@uta.fi               |
| Jussi Hernesniemi     | Pirkanmaa Hospital District, Tampere, Finland                                                                                                                                                           | jussi.hernesniemi@tuni.fi         |
| Daniel Gordin         | Hospital District of Helsinki and Uusimaa, Helsinki,<br>Finland                                                                                                                                         | daniel.gordin@hus.fi              |
| Juha Sinisalo         | Hospital District of Helsinki and Uusimaa, Helsinki,<br>Finland                                                                                                                                         | juha.sinisalo@hus.fi              |
| Marja-Riitta Taskinen | Hospital District of Helsinki and Uusimaa, Helsinki,<br>Finland                                                                                                                                         | marja-riitta.taskinen@helsinki.fi |
| Tiinamaija Tuomi      | Hospital District of Helsinki and Uusimaa, Helsinki,<br>Finland                                                                                                                                         | tiinamaija.tuomi@hus.fi           |
| Timo Hiltunen         | Hospital District of Helsinki and Uusimaa, Helsinki,<br>Finland                                                                                                                                         | timo.hiltunen@hus.fi              |
| Jari Laukkanen        | Central Finland Health Care District, Jyväskylä,<br>Finland                                                                                                                                             | jari.laukkanen@ksshp.fi           |
| Amanda Elliott        | Institute for Molecular Medicine Finland (FIMM),<br>HiLIFE, University of Helsinki, Helsinki, Finland;<br>Broad Institute, Cambridge, MA, USA and<br>Massachusetts General Hospital, Boston, MA,<br>USA | aelliott@broadinstitute.org       |
| Mary Pat Reeve        | Institute for Molecular Medicine Finland (FIMM),<br>HiLIFE, University of Helsinki, Helsinki, Finland                                                                                                   | mary.reeve@helsinki.fi            |
| Sanni Ruotsalainen    | Institute for Molecular Medicine Finland (FIMM),<br>HiLIFE, University of Helsinki, Helsinki, Finland                                                                                                   | sanni.ruotsalainen@helsinki.fi    |
| Dirk Paul             | Astra Zeneca, Cambridge, United Kingdom                                                                                                                                                                 | dirk.paul@astrazeneca.com         |
| Natalie Bowers        | Genentech, San Francisco, CA, United States                                                                                                                                                             | bowersn1@gene.com                 |
| Rion Pendergrass      | Genentech, San Francisco, CA, United States                                                                                                                                                             | penders2@gene.com                 |
| Audrey Chu            | GlaxoSmithKline, Brentford, United Kingdom                                                                                                                                                              | audrey.y.chu@gsk.com              |
| Kirsi Auro            | GlaxoSmithKline, Espoo, Finland                                                                                                                                                                         | kirsi.m.auro@gsk.com              |
| Dermot Reilly         | Janssen Research & Development, LLC, Boston,<br>MA, United States                                                                                                                                       | dreill11@its.jnj.com              |
| Mike Mendelson        | Novartis, Boston, MA, United States                                                                                                                                                                     | mike.mendelson@novartis.com       |

|                      |                                                                                                                                                                        |                                 |
|----------------------|------------------------------------------------------------------------------------------------------------------------------------------------------------------------|---------------------------------|
| Jaakko Parkkinen     | Pfizer, New York, NY, United States                                                                                                                                    | jaakko.parkkinen@pfizer.com     |
| Melissa Miller       | Pfizer, New York, NY, United States                                                                                                                                    | melissa.r.miller@pfizer.com     |
| Tuomo Meretoja       | Hospital District of Helsinki and Uusimaa, Helsinki, Finland                                                                                                           | tuomo.meretoja@hus.fi           |
| Heikki Joensuu       | Hospital District of Helsinki and Uusimaa, Helsinki, Finland                                                                                                           | heikki.joensuu@hus.fi           |
| Olli Carpén          | Hospital District of Helsinki and Uusimaa, Helsinki, Finland                                                                                                           | olli.carpén@helsinki.fi         |
| Johanna Mattson      | Hospital District of Helsinki and Uusimaa, Helsinki, Finland                                                                                                           | johanna.mattson@hus.fi          |
| Eveliina Salminen    | Hospital District of Helsinki and Uusimaa, Helsinki, Finland                                                                                                           | eveliina.e.salminen@hus.fi      |
| Annika Auranen       | Pirkanmaa Hospital District, Tampere, Finland                                                                                                                          | anaura@utu.fi                   |
| Peeter Karihtala     | Northern Ostrobothnia Hospital District, Oulu, Finland                                                                                                                 | peeter.karihtala@oulu.fi        |
| Päivi Auvinen        | Northern Savo Hospital District, Kuopio, Finland                                                                                                                       | paivi.auvinen@kuh.fi            |
| Klaus Elenius        | Hospital District of Southwest Finland, Turku, Finland                                                                                                                 | klaus.elenius@utu.fi            |
| Johanna Schleutker   | Hospital District of Southwest Finland, Turku, Finland                                                                                                                 | johanna.schleutker@utu.fi       |
| Esa Pitkänen         | Institute for Molecular Medicine Finland (FIMM), HiLIFE, University of Helsinki, Helsinki, Finland                                                                     | esa.pitkanen@helsinki.fi        |
| Nina Mars            | Institute for Molecular Medicine Finland (FIMM), HiLIFE, University of Helsinki, Helsinki, Finland                                                                     | nina.mars@helsinki.fi           |
| Mark Daly            | Institute for Molecular Medicine Finland (FIMM), HiLIFE, University of Helsinki, Helsinki, Finland; Broad Institute of MIT and Harvard; Massachusetts General Hospital | mark.daly@helsinki.fi           |
| Relja Popovic        | Abbvie, Chicago, IL, United States                                                                                                                                     | relja.popovic@abbvie.com        |
| Jeffrey Waring       | Abbvie, Chicago, IL, United States                                                                                                                                     | jeff.waring@abbvie.com          |
| Bridget Riley-Gillis | Abbvie, Chicago, IL, United States                                                                                                                                     | bridget.rileygillis@abbvie.com  |
| Anne Lehtonen        | Abbvie, Chicago, IL, United States                                                                                                                                     | anne.lehtonen@abbvie.com        |
| Margarete Fabre      | AstraZeneca, Cambridge, United Kingdom                                                                                                                                 | margarete.fabre@astrazeneca.com |
| Jennifer Schutzman   | Genentech, San Francisco, CA, United States                                                                                                                            | schutzman.jennifer@gene.com     |
| Natalie Bowers       | Genentech, San Francisco, CA, United States                                                                                                                            | bowersn1@gene.com               |
| Rion Pendergrass     | Genentech, San Francisco, CA, United States                                                                                                                            | penders2@gene.com               |
| Diptee Kulkarni      | GlaxoSmithKline, Brentford, United Kingdom                                                                                                                             | diptee.a.kulkarni@gsk.com       |
| Kirsi Auro           | GlaxoSmithKline, Espoo, Finland                                                                                                                                        | kirsi.m.auro@gsk.com            |
| Alessandro Porello   | Janssen Research & Development, LLC, Spring                                                                                                                            | APorrell@ITS.JNJ.com            |

|                          |                                                                                                                                                     |                                 |
|--------------------------|-----------------------------------------------------------------------------------------------------------------------------------------------------|---------------------------------|
|                          | House, PA, United States                                                                                                                            |                                 |
| Andrey Loboda            | Merck, Kenilworth, NJ, United States                                                                                                                | andrey_loboda@merck.com         |
| Heli Lehtonen            | Pfizer, New York, NY, United States                                                                                                                 | heli.lehtonen@pfizer.com        |
| Stefan McDonough         | Pfizer, New York, NY, United States                                                                                                                 | stefan.McDonough@pfizer.com     |
| Sauli Vuoti              | Janssen-Cilag Oy, Espoo, Finland                                                                                                                    | svuoti@its.jnj.com              |
| Kai Kaarniranta          | Northern Savo Hospital District, Kuopio, Finland;<br>Department of Molecular Genetics, University of<br>Lodz, Lodz, Poland                          | kai.kaarniranta@uef.fi          |
| Joni A Turunen           | Helsinki University Hospital and University of<br>Helsinki, Helsinki, Finland; Eye Genetics Group,<br>Folkhälsan Research Center, Helsinki, Finland | joni.turunen@helsinki.fi        |
| Terhi Ollila             | Hospital District of Helsinki and Uusimaa, Helsinki,<br>Finland                                                                                     | terhi.ollila@hus.fi             |
| Hannu Uusitalo           | Pirkanmaa Hospital District, Tampere, Finland                                                                                                       | hannu.uusitalo@tuni.fi          |
| Juha Karjalainen         | Institute for Molecular Medicine Finland (FIMM),<br>HiLIFE, University of Helsinki, Helsinki, Finland                                               | juha.karjalainen@helsinki.fi    |
| Esa Pitkänen             | Institute for Molecular Medicine Finland (FIMM),<br>HiLIFE, University of Helsinki, Helsinki, Finland                                               | esa.pitkanen@helsinki.fi        |
| Mengzhen Liu             | Abbvie, Chicago, IL, United States                                                                                                                  | mengzhen.liu@abbvie.com         |
| Heiko Runz               | Biogen, Cambridge, MA, United States                                                                                                                | heiko.runz@biogen.com           |
| Stephanie Loomis         | Biogen, Cambridge, MA, United States                                                                                                                | stephanie.loomis@biogen.com     |
| Erich Strauss            | Genentech, San Francisco, CA, United States                                                                                                         | strauss.erich@gene.com          |
| Natalie Bowers           | Genentech, San Francisco, CA, United States                                                                                                         | bowersn1@gene.com               |
| Hao Chen                 | Genentech, San Francisco, CA, United States                                                                                                         | haoc@gene.com                   |
| Rion Pendergrass         | Genentech, San Francisco, CA, United States                                                                                                         | penders2@gene.com               |
| Kaisa Tasanen            | Northern Ostrobothnia Hospital District, Oulu,<br>Finland                                                                                           | kaisa.tasanen-maatta@oulu.fi    |
| Laura Huilaja            | Northern Ostrobothnia Hospital District, Oulu,<br>Finland                                                                                           | laura.huilaja@oulu.fi           |
| Katariina Hannula-Jouppi | Hospital District of Helsinki and Uusimaa, Helsinki,<br>Finland                                                                                     | katariina.hannula-jouppi@hus.fi |
| Teea Salmi               | Pirkanmaa Hospital District, Tampere, Finland                                                                                                       | teea.salmi@pshp.fi              |
| Sirkku Peltonen          | Hospital District of Southwest Finland, Turku,<br>Finland                                                                                           | sipelto@utu.fi                  |
| Leena Koulu              | Hospital District of Southwest Finland, Turku,<br>Finland                                                                                           | leena.koulu@tyks.fi             |
| Nizar Smaoui             | Abbvie, Chicago, IL, United States                                                                                                                  | nizar.smaoui@abbvie.com         |
| Fedik Rahimov            | Abbvie, Chicago, IL, United States                                                                                                                  | fedik.rahimov@abbvie.com        |
| Anne Lehtonen            | Abbvie, Chicago, IL, United States                                                                                                                  | anne.lehtonen@abbvie.com        |

|                         |                                                                                                                                                                                                |                                 |
|-------------------------|------------------------------------------------------------------------------------------------------------------------------------------------------------------------------------------------|---------------------------------|
| David Choy              | Genentech, San Francisco, CA, United States                                                                                                                                                    | choy.david@gene.com             |
| Rion Pendergrass        | Genentech, San Francisco, CA, United States                                                                                                                                                    | penders2@gene.com               |
| Dawn Waterworth         | Janssen Research & Development, LLC, Spring House, PA, United States                                                                                                                           | dwaterwo@its.jnj.com            |
| Kirsi Kalpala           | Pfizer, New York, NY, United States                                                                                                                                                            | kirsi.kalpala@pfizer.com        |
| Ying Wu                 | Pfizer, New York, NY, United States                                                                                                                                                            | ying.wu3@pfizer.com             |
| Pirkko Pussinen         | Hospital District of Helsinki and Uusimaa, Helsinki, Finland                                                                                                                                   | pirkko.pussinen@helsinki.fi     |
| Aino Salminen           | Hospital District of Helsinki and Uusimaa, Helsinki, Finland                                                                                                                                   | aino.m.salminen@helsinki.fi     |
| Tuula Salo              | Hospital District of Helsinki and Uusimaa, Helsinki, Finland                                                                                                                                   | tuula.salo@helsinki.fi          |
| David Rice              | Hospital District of Helsinki and Uusimaa, Helsinki, Finland                                                                                                                                   | david.rice@helsinki.fi          |
| Pekka Nieminen          | Hospital District of Helsinki and Uusimaa, Helsinki, Finland                                                                                                                                   | pekka.nieminen@helsinki.fi      |
| Ulla Palotie            | Hospital District of Helsinki and Uusimaa, Helsinki, Finland                                                                                                                                   | ulla.palotie@helsinki.fi        |
| Maria Siponen           | Northern Savo Hospital District, Kuopio, Finland                                                                                                                                               | maria.siponen@uef.fi            |
| Liisa Suominen          | Northern Savo Hospital District, Kuopio, Finland                                                                                                                                               | liisa.suominen@uef.fi           |
| Päivi Mäntylä           | Northern Savo Hospital District, Kuopio, Finland                                                                                                                                               | paivi.mantyla@uef.fi            |
| Ulvi Gursoy             | Hospital District of Southwest Finland, Turku, Finland                                                                                                                                         | ulvi.gursoy@utu.fi              |
| Vuokko Anttonen         | Northern Ostrobothnia Hospital District, Oulu, Finland                                                                                                                                         | vuokko.anttonen@oulu.fi         |
| Kirsi Sipilä            | Research Unit of Oral Health Sciences Faculty of Medicine, University of Oulu, Oulu, Finland;<br>Medical Research Center, Oulu, Oulu University Hospital and University of Oulu, Oulu, Finland | kirsi.sipila@oulu.fi            |
| Rion Pendergrass        | Genentech, San Francisco, CA, United States                                                                                                                                                    | pendergass.sarah@gene.com       |
| Hannele Laivuori        | Institute for Molecular Medicine Finland (FIMM), HiLIFE, University of Helsinki, Helsinki, Finland                                                                                             | hannele.laivuori@helsinki.fi    |
| Venla Kurra             | Pirkanmaa Hospital District, Tampere, Finland                                                                                                                                                  | venla.kurra@tuni.fi             |
| Laura Kotaniemi-Talonen | Pirkanmaa Hospital District, Tampere, Finland                                                                                                                                                  | laura.kotaniemi-talonen@tuni.fi |
| Oskari Heikinheimo      | Hospital District of Helsinki and Uusimaa, Helsinki, Finland                                                                                                                                   | oskari.heikinheimo@helsinki.fi  |
| Ilkka Kalliala          | Hospital District of Helsinki and Uusimaa, Helsinki, Finland                                                                                                                                   | ilkka.kalliala@hus.fi           |
| Lauri Aaltonen          | Hospital District of Helsinki and Uusimaa, Helsinki, Finland                                                                                                                                   | lauri.aaltonen@helsinki.fi      |

|                      |                                                                                                                                                                                 |                                |
|----------------------|---------------------------------------------------------------------------------------------------------------------------------------------------------------------------------|--------------------------------|
|                      | Finland                                                                                                                                                                         |                                |
| Varpu Jokimaa        | Hospital District of Southwest Finland, Turku,<br>Finland                                                                                                                       | varpu.jokimaa@utu.fi           |
| Johannes Kettunen    | Northern Ostrobothnia Hospital District, Oulu,<br>Finland                                                                                                                       | Johannes.Kettunen@oulu.fi      |
| Marja Vääräsmäki     | Northern Ostrobothnia Hospital District, Oulu,<br>Finland                                                                                                                       | marja.vaarasmaki@oulu.fi       |
| Outi Uimari          | Northern Ostrobothnia Hospital District, Oulu,<br>Finland                                                                                                                       | outi.uimari@oulu.fi            |
| Laure Morin-Papunen  | Northern Ostrobothnia Hospital District, Oulu,<br>Finland                                                                                                                       | lmp@cc.oulu.fi                 |
| Maarit Niinimäki     | Northern Ostrobothnia Hospital District, Oulu,<br>Finland                                                                                                                       | maarit.niinimaki@oulu.fi       |
| Terhi Piltonen       | Northern Ostrobothnia Hospital District, Oulu,<br>Finland                                                                                                                       | terhi.piltonen@oulu.fi         |
| Katja Kivinen        | Institute for Molecular Medicine Finland (FIMM),<br>HiLIFE, University of Helsinki, Helsinki, Finland                                                                           | katja.kivinen@helsinki.fi      |
| Elisabeth Widen      | Institute for Molecular Medicine Finland (FIMM),<br>HiLIFE, University of Helsinki, Helsinki, Finland                                                                           | elisabeth.widen@helsinki.fi    |
| Taru Tukiainen       | Institute for Molecular Medicine Finland (FIMM),<br>HiLIFE, University of Helsinki, Helsinki, Finland                                                                           | taru.tukiainen@helsinki.fi     |
| Mary Pat Reeve       | Institute for Molecular Medicine Finland (FIMM),<br>HiLIFE, University of Helsinki, Helsinki, Finland                                                                           | mary.reeve@helsinki.fi         |
| Mark Daly            | Institute for Molecular Medicine Finland (FIMM),<br>HiLIFE, University of Helsinki, Helsinki, Finland;<br>Broad Institute of MIT and Harvard; Massachusetts<br>General Hospital | mark.daly@helsinki.fi          |
| Niko Välimäki        | University of Helsinki, Helsinki, Finland                                                                                                                                       | niko.valimaki@helsinki.fi      |
| Eija Laakkonen       | University of Jyväskylä, Jyväskylä, Finland                                                                                                                                     | eija.k.laakkonen@jyu.fi        |
| Jaakko Tyrmi         | University of Oulu, Oulu, Finland / University of<br>Tampere, Tampere, Finland                                                                                                  | jaakko.tyrmi@oulu.fi           |
| Heidi Silven         | University of Oulu, Oulu, Finland                                                                                                                                               | heidi.silven@student.oulu.fi   |
| Eeva Sliz            | University of Oulu, Oulu, Finland                                                                                                                                               | eeva.sliz@oulu.fi              |
| Riikka Arffman       | University of Oulu, Oulu, Finland                                                                                                                                               | riikka.arffman@oulu.fi         |
| Susanna Savukoski    | University of Oulu, Oulu, Finland                                                                                                                                               | susanna.savukoski@oulu.fi      |
| Triin Laisk          | Estonian biobank, Tartu, Estonia                                                                                                                                                | triin.laisk@ut.ee              |
| Natalia Pujol        | Estonian biobank, Tartu, Estonia                                                                                                                                                | natalia.pujolgualdo@oulu.fi    |
| Mengzhen Liu         | Abbvie, Chicago, IL, United States                                                                                                                                              | mengzhen.liu@abbvie.com        |
| Bridget Riley-Gillis | Abbvie, Chicago, IL, United States                                                                                                                                              | bridget.rileygillis@abbvie.com |

|                            |                                                                                                                                                                                                              |                                    |
|----------------------------|--------------------------------------------------------------------------------------------------------------------------------------------------------------------------------------------------------------|------------------------------------|
| Rion Pendergrass           | Genentech, San Francisco, CA, United States                                                                                                                                                                  | penders2@gene.com                  |
| Janet Kumar                | GlaxoSmithKline, Collegeville, PA, United States                                                                                                                                                             | janet.x.kumar@gsk.com              |
| Kirsi Auro                 | GlaxoSmithKline, Espoo, Finland                                                                                                                                                                              | kirsi.m.auro@gsk.com               |
| Iiris Hovatta              | University of Helsinki, Finland                                                                                                                                                                              | iiris.hovatta@helsinki.fi          |
| Chia-Yen Chen              | Biogen, Cambridge, MA, United States                                                                                                                                                                         | chiayen.chen@biogen.com            |
| Erkki Isometsä             | Hospital District of Helsinki and Uusimaa, Helsinki, Finland                                                                                                                                                 | erkki.isometsa@hus.fi              |
| Hanna Ollila               | Institute for Molecular Medicine Finland (FIMM), HiLIFE, University of Helsinki, Helsinki, Finland                                                                                                           | hanna.m.ollila@helsinki.fi         |
| Jaana Suvisaari            | Finnish Institute for Health and Welfare (THL), Helsinki, Finland                                                                                                                                            | jaana.suvisaari@thl.fi             |
| Antti Mäkitie              | Department of Otorhinolaryngology - Head and Neck Surgery, University of Helsinki and Helsinki University Hospital, Helsinki, Finland                                                                        | antti.makitie@helsinki.fi          |
| Argyro Bizaki-Vallaskangas | Pirkanmaa Hospital District, Tampere, Finland                                                                                                                                                                | argyro.bizaki-vallaskangas@tuni.fi |
| Sanna Toppila-Salmi        | University of Eastern Finland and Kuopio University Hospital, Department of Otorhinolaryngology, Kuopio, Finland and Department of Allergy, Helsinki University Hospital and University of Helsinki, Finland | sanna.salmi@helsinki.fi            |
| Tytti Willberg             | Hospital District of Southwest Finland, Turku, Finland                                                                                                                                                       | tytti.willberg@tyks.fi             |
| Elmo Saarentaus            | Institute for Molecular Medicine Finland (FIMM), HiLIFE, University of Helsinki, Helsinki, Finland                                                                                                           | elmo.saarentaus@helsinki.fi        |
| Antti Aarnisalo            | Hospital District of Helsinki and Uusimaa, Helsinki, Finland                                                                                                                                                 | antti.aarnisalo@hus.fi             |
| Eveliina Salminen          | Hospital District of Helsinki and Uusimaa, Helsinki, Finland                                                                                                                                                 | eveliina.e.salminen@hus.fi         |
| Elisa Rahikkala            | Northern Ostrobothnia Hospital District, Oulu, Finland                                                                                                                                                       | elisa.rahikkala@ppshp.fi           |
| Johannes Kettunen          | Northern Ostrobothnia Hospital District, Oulu, Finland                                                                                                                                                       | johannes.kettunen@oulu.fi          |
| Kristiina Aittomäki        | Department of Medical Genetics, Helsinki University Central Hospital, Helsinki, Finland                                                                                                                      | kristiina.aittomaki@helsinki.fi    |
| Fredrik Åberg              | Transplantation and Liver Surgery Clinic, Helsinki University Hospital, Helsinki University, Helsinki, Finland                                                                                               | fredrik.aberg@helsinki.fi          |
| Mitja Kurki                | Institute for Molecular Medicine Finland (FIMM), HiLIFE, University of Helsinki, Helsinki, Finland;                                                                                                          | mkurki@broadinstitute.org          |

|                             |                                                                                                                                                                                  |                                       |
|-----------------------------|----------------------------------------------------------------------------------------------------------------------------------------------------------------------------------|---------------------------------------|
|                             | Broad Institute, Cambridge, MA, United States                                                                                                                                    |                                       |
| Samuli Ripatti              | Institute for Molecular Medicine Finland (FIMM),<br>HiLIFE, University of Helsinki, Helsinki, Finland                                                                            | samuli.ripatti@helsinki.fi            |
| Mark Daly                   | Institute for Molecular Medicine, Finland (FIMM),<br>HiLIFE, University of Helsinki, Helsinki, Finland;<br>Broad Institute of MIT and Harvard; Massachusetts<br>General Hospital | mark.daly@helsinki.fi                 |
| Juha Karjalainen            | Institute for Molecular Medicine Finland (FIMM),<br>HiLIFE, University of Helsinki, Helsinki, Finland                                                                            | juha.karjalainen@helsinki.fi          |
| Aki Havulinna               | Institute for Molecular Medicine Finland (FIMM),<br>HiLIFE, University of Helsinki, Helsinki, Finland;<br>Finnish Institute for Health and Welfare (THL),<br>Helsinki, Finland   | aki.havulinna@helsinki.fi             |
| Juha Mehtonen               | Institute for Molecular Medicine Finland (FIMM),<br>HiLIFE, University of Helsinki, Helsinki, Finland                                                                            | juha.mehtonen@helsinki.fi             |
| Priit Palta                 | Institute for Molecular Medicine Finland (FIMM),<br>HiLIFE, University of Helsinki, Helsinki, Finland                                                                            | priit.palta@helsinki.fi               |
| Shabbeer Hassan             | Institute for Molecular Medicine Finland (FIMM),<br>HiLIFE, University of Helsinki, Helsinki, Finland                                                                            | shabbeer.hassan@helsinki.fi           |
| Pietro Della Briotta Parolo | Institute for Molecular Medicine Finland (FIMM),<br>HiLIFE, University of Helsinki, Helsinki, Finland                                                                            | pietro.dellabriottaparolo@helsinki.fi |
| Wei Zhou                    | Broad Institute, Cambridge, MA, United States                                                                                                                                    | wzhou@broadinstitute.org              |
| Mutaamba Maasha             | Broad Institute, Cambridge, MA, United States                                                                                                                                    | mmaasha@broadinstitute.org            |
| Shabbeer Hassan             | Institute for Molecular Medicine Finland (FIMM),<br>HiLIFE, University of Helsinki, Helsinki, Finland                                                                            | shabbeer.hassan@helsinki.fi           |
| Susanna Lemmelä             | Institute for Molecular Medicine Finland (FIMM),<br>HiLIFE, University of Helsinki, Helsinki, Finland                                                                            | susanna.lemmela@helsinki.fi           |
| Manuel Rivas                | University of Stanford, Stanford, CA, United States                                                                                                                              | mrivas@stanford.edu                   |
| Aarno Palotie               | Institute for Molecular Medicine Finland (FIMM),<br>HiLIFE, University of Helsinki, Helsinki, Finland                                                                            | aarno.palotie@helsinki.fi             |
| Aoxing Liu                  | Institute for Molecular Medicine Finland (FIMM),<br>HiLIFE, University of Helsinki, Helsinki, Finland                                                                            | aoxing.liu@helsinki.fi                |
| Arto Lehisto                | Institute for Molecular Medicine Finland (FIMM),<br>HiLIFE, University of Helsinki, Helsinki, Finland                                                                            | arto.lehisto@helsinki.fi              |
| Andrea Ganna                | Institute for Molecular Medicine Finland (FIMM),<br>HiLIFE, University of Helsinki, Helsinki, Finland                                                                            | aganna@broadinstitute.org             |
| Vincent Llorens             | Institute for Molecular Medicine Finland (FIMM),<br>HiLIFE, University of Helsinki, Helsinki, Finland                                                                            | vincent.llorens@helsinki.fi           |
| Hannele Laivuori            | Institute for Molecular Medicine Finland (FIMM),                                                                                                                                 | hannele.laivuori@helsinki.fi          |

|                        |                                                                                                                                                                                                         |                                |
|------------------------|---------------------------------------------------------------------------------------------------------------------------------------------------------------------------------------------------------|--------------------------------|
|                        | HiLIFE, University of Helsinki, Helsinki, Finland                                                                                                                                                       |                                |
| Taru Tukiainen         | Institute for Molecular Medicine Finland (FIMM),<br>HiLIFE, University of Helsinki, Helsinki, Finland                                                                                                   | taru.tukiainen@helsinki.fi     |
| Mary Pat Reeve         | Institute for Molecular Medicine Finland (FIMM),<br>HiLIFE, University of Helsinki, Helsinki, Finland                                                                                                   | mary.reeve@helsinki.fi         |
| Henrike Heyne          | Institute for Molecular Medicine Finland (FIMM),<br>HiLIFE, University of Helsinki, Helsinki, Finland                                                                                                   | hheyne@broadinstitute.org      |
| Nina Mars              | Institute for Molecular Medicine Finland (FIMM),<br>HiLIFE, University of Helsinki, Helsinki, Finland                                                                                                   | nina.mars@helsinki.fi          |
| Joel Rämö              | Institute for Molecular Medicine Finland (FIMM),<br>HiLIFE, University of Helsinki, Helsinki, Finland                                                                                                   | joel.ramo@helsinki.fi          |
| Elmo Saarentaus        | Institute for Molecular Medicine Finland (FIMM),<br>HiLIFE, University of Helsinki, Helsinki, Finland                                                                                                   | elmo.saarentaus@helsinki.fi    |
| Hanna Ollila           | Institute for Molecular Medicine Finland (FIMM),<br>HiLIFE, University of Helsinki, Helsinki, Finland                                                                                                   | hanna.m.ollila@helsinki.fi     |
| Rodos Rodosthenous     | Institute for Molecular Medicine Finland (FIMM),<br>HiLIFE, University of Helsinki, Helsinki, Finland                                                                                                   | rodos.rodosthenous@helsinki.fi |
| Satu Strausz           | Institute for Molecular Medicine Finland (FIMM),<br>HiLIFE, University of Helsinki, Helsinki, Finland                                                                                                   | satu.strausz@helsinki.fi       |
| Tuula Palotie          | University of Helsinki and Hospital District of<br>Helsinki and Uusimaa, Helsinki, Finland                                                                                                              | tuula.palotie@helsinki.fi      |
| Kimmo Palin            | University of Helsinki, Helsinki, Finland                                                                                                                                                               | kimmo.palin@helsinki.fi        |
| Javier Garcia-Tabuenca | University of Tampere, Tampere, Finland                                                                                                                                                                 | javier.graciatabuenca@tuni.fi  |
| Harri Siirtola         | University of Tampere, Tampere, Finland                                                                                                                                                                 | harri.siirtola@tuni.fi         |
| Tuomo Kiiskinen        | Institute for Molecular Medicine Finland (FIMM),<br>HiLIFE, University of Helsinki, Helsinki, Finland                                                                                                   | tuomo.kiiskinen@helsinki.fi    |
| Jiwoo Lee              | HiLIFE, University of Helsinki, Helsinki, Finland;<br>Broad Institute, Cambridge, MA, United States                                                                                                     | jiwoo.lee@helsinki.fi          |
| Kristin Tsuo           | Institute for Molecular Medicine Finland (FIMM),<br>HiLIFE, University of Helsinki, Helsinki, Finland;<br>Broad Institute, Cambridge, MA, United States                                                 | kristintsuo@fas.harvard.edu    |
| Amanda Elliott         | Institute for Molecular Medicine Finland (FIMM),<br>HiLIFE, University of Helsinki, Helsinki, Finland;<br>Broad Institute, Cambridge, MA, USA and<br>Massachusetts General Hospital, Boston, MA,<br>USA | aelliott@broadinstitute.org    |
| Kati Kristiansson      | THL Biobank / Finnish Institute for Health and<br>Welfare (THL), Helsinki, Finland                                                                                                                      | kati.kristiansson@thl.fi       |



|                   |                                                                                                                 |                               |
|-------------------|-----------------------------------------------------------------------------------------------------------------|-------------------------------|
| Mikko Arvas       | Finnish Red Cross Blood Service / Finnish Hematology Registry and Clinical Biobank, Helsinki, Finland           | mikko.arvas@veripalvelu.fi    |
| Kati Hyvärinen    | Finnish Red Cross Blood Service, Helsinki, Finland                                                              | kati.hyvarinen@veripalvelu.fi |
| Jarmo Ritari      | Finnish Red Cross Blood Service, Helsinki, Finland                                                              | jarmo.ritari@veripalvelu.fi   |
| Olli Carpén       | Helsinki Biobank / Helsinki University and Hospital District of Helsinki and Uusimaa, Helsinki                  | olli.carpén@helsinki.fi       |
| Johannes Kettunen | Northern Finland Biobank Borealis / University of Oulu / Northern Ostrobothnia Hospital District, Oulu, Finland | johannes.kettunen@oulu.fi     |
| Katri Pylkäs      | University of Oulu, Oulu, Finland                                                                               | katri.pylkas@oulu.fi          |
| Eeva Sliz         | University of Oulu, Oulu, Finland                                                                               | eeva.sliz@oulu.fi             |
| Minna Karjalainen | University of Oulu, Oulu, Finland                                                                               | minna.k.karjalainen@oulu.fi   |
| Tuomo Mantere     | Northern Finland Biobank Borealis / University of Oulu / Northern Ostrobothnia Hospital District, Oulu, Finland | tuomo.mantere@oulu.fi         |
| Eeva Kangasniemi  | Finnish Clinical Biobank Tampere / University of Tampere / Pirkanmaa Hospital District, Tampere, Finland        | eeva.kangasniemi@pshp.fi      |
| Sami Heikkinen    | University of Eastern Finland, Kuopio, Finland                                                                  | sami.heikkinen@uef.fi         |
| Arto Mannermaa    | Biobank of Eastern Finland / University of Eastern Finland / Northern Savo Hospital District, Kuopio, Finland   | arto.mannermaa@uef.fi         |
| Eija Laakkonen    | University of Jyväskylä, Jyväskylä, Finland                                                                     | eija.k.laakkonen@jyu.fi       |
| Nina Pitkänen     | Auria Biobank / University of Turku / Hospital District of Southwest Finland, Turku, Finland                    | Niina.Pitkanen@tyks.fi        |
| Samuel Lessard    | Translational Sciences, Sanofi R&D, Framingham, MA, USA                                                         | samuel.lessard@sanofi.com     |
| Clément Chatelain | Translational Sciences, Sanofi R&D, Framingham, MA, USA                                                         | clement.chatelain@sanofi.com  |
| Lila Kallio       | Auria Biobank / University of Turku / Hospital District of Southwest Finland, Turku, Finland                    | Lila.Kallio@tyks.fi           |
| Tiina Wahlfors    | THL Biobank / Finnish Institute for Health and Welfare (THL), Helsinki, Finland                                 | tiina.wahlfors@thl.fi         |
| Jukka Partanen    | Finnish Red Cross Blood Service / Finnish Hematology Registry and Clinical Biobank, Helsinki, Finland           | jukka.partanen@veripalvelu.fi |
| Eero Punkka       | Helsinki Biobank / Helsinki University and Hospital District of Helsinki and Uusimaa, Helsinki                  | eero.punkka@hus.fi            |

|                             |                                                                                                                                                                                             |                                       |
|-----------------------------|---------------------------------------------------------------------------------------------------------------------------------------------------------------------------------------------|---------------------------------------|
| Raisa Serpi                 | Northern Finland Biobank Borealis / University of Oulu / Northern Ostrobothnia Hospital District, Oulu, Finland                                                                             | raisa.serpi@ppshp.fi                  |
| Sanna Siltanen              | Finnish Clinical Biobank Tampere / University of Tampere / Pirkanmaa Hospital District, Tampere, Finland                                                                                    | sanna.siltanen@pshp.fi                |
| Veli-Matti Kosma            | Biobank of Eastern Finland / University of Eastern Finland / Northern Savo Hospital District, Kuopio, Finland                                                                               | veli-matti.kosma@uef.fi               |
| Teijo Kuopio                | Central Finland Biobank / University of Jyväskylä / Central Finland Health Care District, Jyväskylä, Finland                                                                                | teijo.kuopio@ksshp.fi                 |
| Anu Jalanko                 | Institute for Molecular Medicine Finland (FIMM), HiLIFE, University of Helsinki, Helsinki, Finland                                                                                          | anu.jalanko@helsinki.fi               |
| Huei-Yi Shen                | Institute for Molecular Medicine Finland (FIMM), HiLIFE, University of Helsinki, Helsinki, Finland                                                                                          | huei-yi.shen@helsinki.fi              |
| Risto Kajanne               | Institute for Molecular Medicine Finland (FIMM), HiLIFE, University of Helsinki, Helsinki, Finland                                                                                          | risto.kajanne@helsinki.fi             |
| Mervi Aavikko               | Institute for Molecular Medicine Finland (FIMM), HiLIFE, University of Helsinki, Helsinki, Finland                                                                                          | mervi.aavikko@helsinki.fi             |
| Helen Cooper                | Institute for Molecular Medicine Finland (FIMM), HiLIFE, University of Helsinki, Helsinki, Finland                                                                                          | helen.cooper@helsinki.fi              |
| Denise Öller                | Institute for Molecular Medicine Finland (FIMM), HiLIFE, University of Helsinki, Helsinki, Finland                                                                                          | denise.oller@helsinki.fi              |
| Rasko Leinonen              | Institute for Molecular Medicine Finland (FIMM), HiLIFE, University of Helsinki, Helsinki, Finland; European Molecular Biology Laboratory, European Bioinformatics Institute, Cambridge, UK | rasko@ebi.ac.uk                       |
| Henna Palin                 | Finnish Clinical Biobank Tampere / University of Tampere / Pirkanmaa Hospital District, Tampere, Finland                                                                                    | henna.palin@pshp.fi                   |
| Malla-Maria Linna           | Helsinki Biobank / Helsinki University and Hospital District of Helsinki and Uusimaa, Helsinki                                                                                              | malla-maria.linna@hus.fi              |
| Mitja Kurki                 | Institute for Molecular Medicine Finland (FIMM), HiLIFE, University of Helsinki, Helsinki, Finland; Broad Institute, Cambridge, MA, United States                                           | mkurki@broadinstitute.org             |
| Juha Karjalainen            | Institute for Molecular Medicine Finland (FIMM), HiLIFE, University of Helsinki, Helsinki, Finland                                                                                          | juha.karjalainen@helsinki.fi          |
| Pietro Della Briotta Parolo | Institute for Molecular Medicine Finland (FIMM),                                                                                                                                            | pietro.dellabriottaparolo@helsinki.fi |

|                          |                                                                                                                                                                                |                                 |
|--------------------------|--------------------------------------------------------------------------------------------------------------------------------------------------------------------------------|---------------------------------|
|                          | HiLIFE, University of Helsinki, Helsinki, Finland                                                                                                                              |                                 |
| Arto Lehisto             | Institute for Molecular Medicine Finland (FIMM),<br>HiLIFE, University of Helsinki, Helsinki, Finland                                                                          | arto.lehisto@helsinki.fi        |
| Juha Mehtonen            | Institute for Molecular Medicine Finland (FIMM),<br>HiLIFE, University of Helsinki, Helsinki, Finland                                                                          | juha.mehtonen@helsinki.fi       |
| Wei Zhou                 | Broad Institute, Cambridge, MA, United States                                                                                                                                  | wzhou@broadinstitute.org        |
| Masahiro Kanai           | Broad Institute, Cambridge, MA, United States                                                                                                                                  | mkanai@broadinstitute.org       |
| Mutaamba Maasha          | Broad Institute, Cambridge, MA, United States                                                                                                                                  | mmaasha@broadinstitute.org      |
| Zhili Zheng              | Broad Institute, Cambridge, MA, United States                                                                                                                                  | zhengzhi@broadinstitute.org     |
| Hannele Laivuori         | Institute for Molecular Medicine Finland (FIMM),<br>HiLIFE, University of Helsinki, Helsinki, Finland                                                                          | hannele.laivuori@helsinki.fi    |
| Aki Havulinna            | Institute for Molecular Medicine Finland (FIMM),<br>HiLIFE, University of Helsinki, Helsinki, Finland;<br>Finnish Institute for Health and Welfare (THL),<br>Helsinki, Finland | aki.havulinna@helsinki.fi       |
| Susanna Lemmelä          | Institute for Molecular Medicine Finland (FIMM),<br>HiLIFE, University of Helsinki, Helsinki, Finland                                                                          | susanna.lemmela@helsinki.fi     |
| Tuomo Kiiskinen          | Institute for Molecular Medicine Finland (FIMM),<br>HiLIFE, University of Helsinki, Helsinki, Finland                                                                          | tuomo.kiiskinen@helsinki.fi     |
| L. Elisa Lahtela         | Institute for Molecular Medicine Finland (FIMM),<br>HiLIFE, University of Helsinki, Helsinki, Finland                                                                          | laura.lahtela@helsinki.fi       |
| Mari Kaunisto            | Institute for Molecular Medicine Finland (FIMM),<br>HiLIFE, University of Helsinki, Helsinki, Finland                                                                          | mari.kaunisto@helsinki.fi       |
| Elina Kilpeläinen        | Institute for Molecular Medicine Finland (FIMM),<br>HiLIFE, University of Helsinki, Helsinki, Finland                                                                          | elina.kilpelainen@helsinki.fi   |
| Timo P. Sipilä           | Institute for Molecular Medicine Finland (FIMM),<br>HiLIFE, University of Helsinki, Helsinki, Finland                                                                          | timo.p.sipila@helsinki.fi       |
| Oluwaseun Alexander Dada | Institute for Molecular Medicine Finland (FIMM),<br>HiLIFE, University of Helsinki, Helsinki, Finland                                                                          | alexander.dada@helsinki.fi      |
| Awaisa Ghazal            | Institute for Molecular Medicine Finland (FIMM),<br>HiLIFE, University of Helsinki, Helsinki, Finland                                                                          | awaisa.ghazal@helsinki.fi       |
| Anastasia Kytölä         | Institute for Molecular Medicine Finland (FIMM),<br>HiLIFE, University of Helsinki, Helsinki, Finland                                                                          | anastasia.shcherban@helsinki.fi |
| Rigbe Weldatsadik        | Institute for Molecular Medicine Finland (FIMM),<br>HiLIFE, University of Helsinki, Helsinki, Finland                                                                          | rigbe.weldatsadik@helsinki.fi   |
| Sanni Ruotsalainen       | Institute for Molecular Medicine Finland (FIMM),<br>HiLIFE, University of Helsinki, Helsinki, Finland                                                                          | sanni.ruotsalainen@helsinki.fi  |
| Kati Donner              | Institute for Molecular Medicine Finland (FIMM),<br>HiLIFE, University of Helsinki, Helsinki, Finland                                                                          | kati.donner@helsinki.fi         |

|                   |                                                                                                       |                              |
|-------------------|-------------------------------------------------------------------------------------------------------|------------------------------|
| Timo P. Sipilä    | Institute for Molecular Medicine Finland (FIMM),<br>HiLIFE, University of Helsinki, Helsinki, Finland | timo.p.sipila@helsinki.fi    |
| Anu Loukola       | Helsinki Biobank / Helsinki University and Hospital<br>District of Helsinki and Uusimaa, Helsinki     | anu.loukola@hus.fi           |
| Päivi Laiho       | THL Biobank / Finnish Institute for Health and<br>Welfare (THL), Helsinki, Finland                    | paivi.laiho@thl.fi           |
| Tuuli Sistonen    | THL Biobank / Finnish Institute for Health and<br>Welfare (THL), Helsinki, Finland                    | tuuli.sistonen@thl.fi        |
| Essi Kaiharju     | THL Biobank / Finnish Institute for Health and<br>Welfare (THL), Helsinki, Finland                    | essi.kaiharju@thl.fi         |
| Markku Laukkanen  | THL Biobank / Finnish Institute for Health and<br>Welfare (THL), Helsinki, Finland                    | markku.laukkanen@thl.fi      |
| Elina Järvensivu  | THL Biobank / Finnish Institute for Health and<br>Welfare (THL), Helsinki, Finland                    | elina.jarvensivu@thl.fi      |
| Sini Lähteenmäki  | THL Biobank / Finnish Institute for Health and<br>Welfare (THL), Helsinki, Finland                    | sini.lahteenmaki@thl.fi      |
| Lotta Männikkö    | THL Biobank / Finnish Institute for Health and<br>Welfare (THL), Helsinki, Finland                    | lotta.mannikko@thl.fi        |
| Regis Wong        | THL Biobank / Finnish Institute for Health and<br>Welfare (THL), Helsinki, Finland                    | regis.wong@thl.fi            |
| Auli Toivola      | THL Biobank / Finnish Institute for Health and<br>Welfare (THL), Helsinki, Finland                    | auli.toivola@thl.fi          |
| Minna Brunfeldt   | THL Biobank / Finnish Institute for Health and<br>Welfare (THL), Helsinki, Finland                    | minna.brunfeldt@thl.fi       |
| Hannele Mattsson  | THL Biobank / Finnish Institute for Health and<br>Welfare (THL), Helsinki, Finland                    | hannele.mattsson@thl.fi      |
| Kati Kristiansson | THL Biobank / Finnish Institute for Health and<br>Welfare (THL), Helsinki, Finland                    | kati.kristiansson@thl.fi     |
| Susanna Lemmelä   | Institute for Molecular Medicine Finland (FIMM),<br>HiLIFE, University of Helsinki, Helsinki, Finland | susanna.lemmela@helsinki.fi  |
| Sami Koskelainen  | THL Biobank / Finnish Institute for Health and<br>Welfare (THL), Helsinki, Finland                    | sami.koskelainen@thl.fi      |
| Tero Hiekkalinna  | THL Biobank / Finnish Institute for Health and<br>Welfare (THL), Helsinki, Finland                    | tero.hiekkalinna@helsinki.fi |
| Teemu Paajanen    | THL Biobank / Finnish Institute for Health and<br>Welfare (THL), Helsinki, Finland                    | teemu.paajanen@thl.fi        |
| Priit Palta       | Institute for Molecular Medicine Finland (FIMM),<br>HiLIFE, University of Helsinki, Helsinki, Finland | priit.palta@helsinki.fi      |
| Shuang Luo        | Institute for Molecular Medicine Finland (FIMM),                                                      | shuang.luo@helsinki.fi       |

|                                   |                                                                                                       |                               |
|-----------------------------------|-------------------------------------------------------------------------------------------------------|-------------------------------|
|                                   | HiLIFE, University of Helsinki, Helsinki, Finland                                                     |                               |
| Tarja Laitinen                    | Pirkanmaa Hospital District, Tampere, Finland                                                         | tarja.laitinen@pshp.fi        |
| Mary Pat Reeve                    | Institute for Molecular Medicine Finland (FIMM),<br>HiLIFE, University of Helsinki, Helsinki, Finland | mary.reeve@helsinki.fi        |
| Shanmukha Sampath<br>Padmanabhuni | Institute for Molecular Medicine Finland (FIMM),<br>HiLIFE, University of Helsinki, Helsinki, Finland | sam.padmanabhuni@helsinki.fi  |
| Marianna Niemi                    | University of Tampere, Tampere, Finland                                                               | marianna.niemi@tuni.fi        |
| Harri Siirtola                    | University of Tampere, Tampere, Finland                                                               | harri.siirtola@tuni.fi        |
| Javier Gracia-Tabuenca            | University of Tampere, Tampere, Finland                                                               | javier.graciatabuenca@tuni.fi |
| Mika Helminen                     | University of Tampere, Tampere, Finland                                                               | mika.helminen@tuni.fi         |
| Tiina Luukkaala                   | University of Tampere, Tampere, Finland                                                               | tiina.luukkaala@tuni.fi       |
| Iida Vähätalo                     | University of Tampere, Tampere, Finland                                                               | iida.vahatalo@epshp.fi        |
| Jyrki Tammerluoto                 | Institute for Molecular Medicine Finland (FIMM),<br>HiLIFE, University of Helsinki, Helsinki, Finland | jyrki.tammerluoto@helsinki.fi |
| Marco Hautalahti                  | Finnish Biobank Cooperative - FINBB                                                                   | marco.hautalahti@finbb.fi     |
| Johanna Mäkelä                    | Finnish Biobank Cooperative - FINBB                                                                   | johanna.makela@finbb.fi       |
| Sarah Smith                       | Finnish Biobank Cooperative - FINBB                                                                   | sarah.smith@finbb.fi          |
| Tom Southerington                 | Finnish Biobank Cooperative - FINBB                                                                   | tom.southerington@finbb.fi    |
| Petri Lehto                       | Finnish Biobank Cooperative - FINBB                                                                   | petri.lehto@finbb.fi          |
